# Supplementary material
Source: publisher figshare collection journal article supplement (https://tandf.figshare.com/articles/dataset/_/11276222)
Supplement: Supplementary file 1 [file 1]

Archive with 6 entries (6 files):
- tbbb_a_1696179_sm7629.pdf
- tbbb_a_1696179_sm7628.pdf
- tbbb_a_1696179_sm7627.pdf
- tbbb_a_1696179_sm7626.pdf
- tbbb_a_1696179_sm7625.pdf
- tbbb_a_1696179_sm7624.pdf
