# Supplementary material
Source: publisher figshare collection journal article supplement (https://tandf.figshare.com/articles/dataset/_/11276222)
Supplement: Supplementary file 1 [file 1 › tbbb_a_1696179_sm7624.pdf]

Supplementary Material 1. RNA-Seq data of soybean seeds.

| GEO series | Platform | GEO accession | GEO title                        | SRA accession | Source name                                               | Stage                      |
|------------|----------|---------------|----------------------------------|---------------|-----------------------------------------------------------|----------------------------|
| GSE29163   | GPL11192 | GSM721725     | Globular Stage Whole Seed        | SRR203351     | Soybean seeds containing globular-stage embryos           | globular-stage             |
| GSE29163   | GPL11192 | GSM721725     | Globular Stage Whole Seed        | SRR203352     | Soybean seeds containing globular-stage embryos           | globular-stage             |
| GSE29163   | GPL11192 | GSM721725     | Globular Stage Whole Seed        | SRR203353     | Soybean seeds containing globular-stage embryos           | globular-stage             |
| GSE42871   | GPL11192 | GSM1056094    | R08_4DAF_BR1                     | SRR639162     | whole seed                                                | 4 days after flowering     |
| GSE42871   | GPL15008 | GSM1056095    | R83_4DAF_BR2                     | SRR639163     | whole seed                                                | 4 days after flowering     |
| GSE29163   | GPL11192 | GSM721726     | Heart Stage Whole Seed           | SRR203354     | Soybean seeds containing heart-stage embryos              | heart-stage                |
| GSE29163   | GPL11192 | GSM721726     | Heart Stage Whole Seed           | SRR203355     | Soybean seeds containing heart-stage embryos              | heart-stage                |
| GSE42871   | GPL11192 | GSM1056096    | R09_12-14DAF_BR1                 | SRR639164     | whole seed                                                | 12-14 days after flowering |
| GSE42871   | GPL15008 | GSM1056097    | R59_12-14DAF_BR2                 | SRR639165     | whole seed                                                | 12-14 days after flowering |
| GSE29163   | GPL11192 | GSM721727     | Cotyledon Stage Whole Seed       | SRR203356     | Soybean seeds containing cotyledon-stage embryos          | cotyledon-stage            |
| GSE29163   | GPL11192 | GSM721727     | Cotyledon Stage Whole Seed       | SRR203357     | Soybean seeds containing cotyledon-stage embryos          | cotyledon-stage            |
| GSE29163   | GPL11192 | GSM721728     | Early-Mturation Stage Whole Seed | SRR203358     | Soybean seeds containing early-maturation stage seeds     | early maturation-stage     |
| GSE29163   | GPL11192 | GSM721728     | Early-Mturation Stage Whole Seed | SRR203359     | Soybean seeds containing early-maturation stage seeds     | early maturation-stage     |
| GSE29163   | GPL11192 | GSM721728     | Early-Mturation Stage Whole Seed | SRR203360     | Soybean seeds containing early-maturation stage seeds     | early maturation-stage     |
| GSE42871   | GPL15008 | GSM1056098    | R36_22-24DAF_BR1                 | SRR639166     | whole seed                                                | 22-24 days after flowering |
| GSE42871   | GPL15008 | GSM1056099    | R60_22-24DAF_BR2                 | SRR639167     | whole seed                                                | 22-24 days after flowering |
| GSE42871   | GPL11192 | GSM1056100    | R11_5-6mgWS_BR1                  | SRR639168     | whole seed                                                | 5-6mg fresh weight         |
| GSE42871   | GPL15008 | GSM1056101    | R61_5-6mgWS_BR2                  | SRR639169     | whole seed                                                | 5-6mg fresh weight         |
| GSE21116   | GPL10267 | GSM528201     | Wild type soybean seed           | SRR038864     | Seed                                                      | midmaturation-stage        |
| GSE21116   | GPL10267 | GSM528201     | Wild type soybean seed           | SRR038865     | Seed                                                      | midmaturation-stage        |
| GSE21116   | GPL10267 | GSM528202     | SP- soybean seed                 | SRR038866     | Seed                                                      | midmaturation-stage        |
| GSE21116   | GPL10267 | GSM528202     | SP- soybean seed                 | SRR038867     | Seed                                                      | midmaturation-stage        |
| GSE42871   | GPL11192 | GSM1056106    | R14_DrySeed_BR1                  | SRR639174     | whole seed                                                | dry mature seed            |
| GSE42871   | GPL15008 | GSM1056107    | R103_DrySeed_BR2                 | SRR639175     | whole seed                                                | dry mature seed            |
| GSE29134   | GPL11192 | GSM721279     | Dry seed                         | SRR203035     | Whole dry seeds                                           | dry-stage                  |
| GSE29134   | GPL11192 | GSM721279     | Dry seed                         | SRR203036     | Whole dry seeds                                           | dry-stage                  |
| GSE29163   | GPL11192 | GSM721729     | Dry Whole Seed                   | SRR203361     | Dry seeds                                                 | dry-stage                  |
| GSE29163   | GPL11192 | GSM721729     | Dry Whole Seed                   | SRR203362     | Dry seeds                                                 | dry-stage                  |
| GSE34852   | GPL15087 | GSM856145     | cotyledons                       | SRR394319     | mRNA-seq of cotyledons                                    | 20 days after flowering    |
| GSE42871   | GPL11192 | GSM1056102    | R12_100-200mgCOT_BR1             | SRR639170     | cotyledon                                                 | 100-200mg fresh weight     |
| GSE42871   | GPL15008 | GSM1056103    | R62_100-200mgCOT_BR2             | SRR639171     | cotyledon                                                 | 100-200mg fresh weight     |
| GSE29134   | GPL11192 | GSM721277     | B1 stage cotyledons              | SRR203030     | Embryonic cotyledons of mid-maturation (B1) stage embryos | mid-maturation stage       |
| GSE29134   | GPL11192 | GSM721277     | B1 stage cotyledons              | SRR203031     | Embryonic cotyledons of mid-maturation (B1) stage embryos | mid-maturation stage       |
| GSE42871   | GPL11192 | GSM1056104    | R13_400-500mgCOT_BR1             | SRR639172     | cotyledon                                                 | 400-500mg fresh weight     |
| GSE42871   | GPL15008 | GSM1056105    | R63_400-500mgCOT_BR2             | SRR639173     | cotyledon                                                 | 400-500mg fresh weight     |
| GSE29134   | GPL11192 | GSM721278     | AA1 stage cotyledons             | SRR203032     | embryonic cotyledon                                       | late-maturation stage      |
| GSE29134   | GPL11192 | GSM721278     | AA1 stage cotyledons             | SRR203033     | embryonic cotyledon                                       | late-maturation stage      |
| GSE29134   | GPL11192 | GSM721278     | AA1 stage cotyledons             | SRR203034     | embryonic cotyledon                                       | late-maturation stage      |
