# Supplementary material
Source: publisher figshare collection journal article supplement (https://tandf.figshare.com/articles/dataset/_/11276222)
Supplement: Supplementary file 1 [file 1 › tbbb_a_1696179_sm7625.pdf]

Supplementary Material 2. Primer sequence for cDNA cloning and RT-PCR

| Locus ID        | Gene name     | Experiment   | Primer sequence              |
|-----------------|---------------|--------------|------------------------------|
| Glyma.06g229900 | <i>Gmppc2</i> | cDNA cloning | 5'-caccatggcaaacaggaacttg-3' |
|                 |               |              | 5'-ttagccagtgtttgcaag-3'     |
| Glyma.06g229900 | <i>Gmppc2</i> | qRT-PCR      | 5'-gcgccaagtctctaccttg-3'    |
|                 |               |              | 5'-tcctctgtcatgggaaggtc-3'   |
| Glyma.08g146500 | <i>Actin</i>  | qRT-PCR      | 5'-gtcggggaaggggacttaca-3'   |
|                 |               |              | 5'-ttcatacagcaggcaagcac-3'   |
