# Supplementary material
Source: publisher figshare collection journal article supplement (https://tandf.figshare.com/articles/dataset/_/11276222)
Supplement: Supplementary file 1 [file 1 › tbbb_a_1696179_sm7627.pdf]

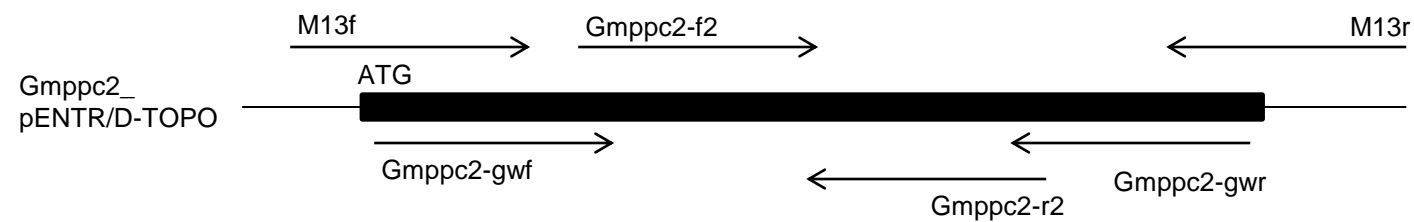

**Supplementary Material 4.** Determination of the cDNA sequence of *Gmppc2*. Bold line: the cDNA insert cloned into pENTR/D-TOPO. Arrow: the region sequenced by a corresponding primer.
