# Supplementary material
Source: publisher figshare collection journal article supplement (https://tandf.figshare.com/articles/dataset/_/11276222)
Supplement: Supplementary file 1 [file 1 › tbbb_a_1696179_sm7628.pdf]

Supplementary Material 5. Genes that were co-expressed with Gmppc2. The top 1% of the genes showing expression patterns similar to that of Gmppc2 are listed.

| Transcript identifier | Distance in correspondence analysis | Homologues in Arabidopsis | Functional annotation based on Arabidopsis genes (TAIR10).                                          |
|-----------------------|-------------------------------------|---------------------------|-----------------------------------------------------------------------------------------------------|
| Glyma.06G166100.1     | 0.596                               | AT3G26890.1               |                                                                                                     |
| Glyma.07G271000.2     | 0.618                               | AT2G02410.1               |                                                                                                     |
| Glyma.08G092000.1     | 0.674                               | AT2G01980.1               | sodium proton exchanger, putative (NHX7) (SOS1)                                                     |
| Glyma.17G137800.1     | 0.675                               | AT1G62710.1               | beta vacuolar processing enzyme                                                                     |
| Glyma.02G072000.2     | 0.681                               | AT3G13460.4               | evolutionarily conserved C-terminal region 2                                                        |
| Glyma.08G253000.2     | 0.684                               | AT2G03890.1               | phosphoinositide 4-kinase gamma 7                                                                   |
| Glyma.09G052600.3     | 0.696                               | AT1G06430.1               | FTSH protease 8                                                                                     |
| Glyma.10G087900.1     | 0.705                               |                           |                                                                                                     |
| Glyma.15G267700.2     | 0.717                               | AT2G44280.1               | Major facilitator superfamily protein                                                               |
| Glyma.05G029500.1     | 0.730                               | AT2G27140.1               | HSP20-like chaperones superfamily protein                                                           |
| Glyma.12G078500.2     | 0.735                               | AT5G60760.1               | P-loop containing nucleoside triphosphate hydrolases superfamily protein                            |
| Glyma.08G237600.1     | 0.736                               |                           |                                                                                                     |
| Glyma.07G060400.1     | 0.745                               | AT2G46270.1               | G-box binding factor 3                                                                              |
| Glyma.09G258900.2     | 0.747                               | AT3G61415.1               | SKP1-like 21                                                                                        |
| Glyma.06G115900.1     | 0.747                               | AT1G77400.1               |                                                                                                     |
| Glyma.08G122000.1     | 0.748                               | AT5G46400.1               | Tetratricopeptide repeat (TPR)-like superfamily protein                                             |
| Glyma.02G283100.1     | 0.750                               |                           |                                                                                                     |
| Glyma.08G251300.4     | 0.759                               | AT5G38895.3               | RING/U-box superfamily protein                                                                      |
| Glyma.08G147500.1     | 0.775                               | AT3G18680.1               | Amino acid kinase family protein                                                                    |
| Glyma.19G110800.1     | 0.777                               | AT3G13460.1               | evolutionarily conserved C-terminal region 2                                                        |
| Glyma.16G220100.5     | 0.788                               | AT5G04930.1               | aminophospholipid ATPase 1                                                                          |
| Glyma.16G035000.2     | 0.797                               | AT1G63800.1               | ubiquitin-conjugating enzyme 5                                                                      |
| Glyma.04G154400.1     | 0.802                               |                           |                                                                                                     |
| Glyma.09G029100.1     | 0.802                               | AT1G64890.1               | Major facilitator superfamily protein                                                               |
| Glyma.02G235800.1     | 0.807                               | AT3G51620.2               | PAP/OAS1 substrate-binding domain superfamily                                                       |
| Glyma.16G142800.1     | 0.811                               | AT4G36870.1               | BEL1-like homeodomain 2                                                                             |
| Glyma.08G296800.1     | 0.812                               | AT1G69830.1               | alpha-amylase-like 3                                                                                |
| Glyma.01G149100.1     | 0.813                               |                           |                                                                                                     |
| Glyma.06G176100.1     | 0.813                               | AT3G48310.1               | cytochrome P450, family 71, subfamily A, polypeptide 22                                             |
| Glyma.08G344600.3     | 0.815                               | AT3G56500.1               | serine-rich protein-related                                                                         |
| Glyma.06G229900.2     | 0.820                               | AT3G14940.1               | phosphoenolpyruvate carboxylase 3                                                                   |
| Glyma.20G227300.1     | 0.826                               | AT3G04350.1               | Plant protein of unknown function (DUF946)                                                          |
| Glyma.09G088300.4     | 0.827                               | AT5G46410.1               | SCP1-like small phosphatase 4                                                                       |
| Glyma.U025900.1       | 0.828                               | AT3G15260.1               | Protein phosphatase 2C family protein                                                               |
| Glyma.01G115000.1     | 0.828                               | AT5G01260.2               | Carbohydrate-binding-like fold                                                                      |
| Glyma.15G047100.1     | 0.829                               | AT1G71240.2               | Plant protein of unknown function (DUF639)                                                          |
| Glyma.03G045000.1     | 0.829                               | AT3G14460.1               | LRR and NB-ARC domains-containing disease resistance protein                                        |
| Glyma.08G107200.1     | 0.834                               | AT3G23710.1               | Tic22-like family protein                                                                           |
| Glyma.05G203400.1     | 0.835                               | AT5G50600.1               | hydroxysteroid dehydrogenase 1                                                                      |
| Glyma.15G221500.1     | 0.835                               |                           |                                                                                                     |
| Glyma.06G198500.1     | 0.843                               |                           |                                                                                                     |
| Glyma.07G119300.2     | 0.843                               | AT1G02145.3               | homolog of asparagine-linked glycosylation 12                                                       |
| Glyma.08G182100.1     | 0.843                               | AT3G26330.1               | cytochrome P450, family 71, subfamily B, polypeptide 37                                             |
| Glyma.06G088500.9     | 0.844                               | AT4G32850.5               | nuclear poly(a) polymerase                                                                          |
| Glyma.06G189400.1     | 0.847                               | AT1G74780.1               | Nodulin-like / Major Facilitator Superfamily protein                                                |
| Glyma.09G089400.1     | 0.850                               | AT5G61330.1               | rRNA processing protein-related                                                                     |
| Glyma.17G041500.3     | 0.853                               | AT1G48280.1               | hydroxyproline-rich glycoprotein family protein                                                     |
| Glyma.05G076800.1     | 0.855                               | AT4G20010.1               | plastid transcriptionally active 9                                                                  |
| Glyma.16G220100.2     | 0.856                               | AT5G04930.1               | aminophospholipid ATPase 1                                                                          |
| Glyma.16G097500.1     | 0.858                               | AT2G36010.2               | E2F transcription factor 3                                                                          |
| Glyma.19G115500.1     | 0.859                               |                           |                                                                                                     |
| Glyma.11G221200.1     | 0.859                               | AT3G55560.1               | AT-hook protein of GA feedback 2                                                                    |
| Glyma.17G041500.1     | 0.860                               | AT1G48280.1               | hydroxyproline-rich glycoprotein family protein                                                     |
| Glyma.06G158100.3     | 0.862                               | AT1G77580.2               | Plant protein of unknown function (DUF869)                                                          |
| Glyma.07G015000.1     | 0.862                               | AT4G32850.5               | nuclear poly(a) polymerase                                                                          |
| Glyma.09G184300.2     | 0.863                               | AT3G12250.1               | TGACG motif-binding factor 6                                                                        |
| Glyma.04G017200.1     | 0.864                               | AT1G76360.1               | Protein kinase superfamily protein                                                                  |
| Glyma.12G205700.1     | 0.865                               | AT1G03790.1               | Zinc finger C-x8-C-x5-C-x3-H type family protein                                                    |
| Glyma.01G115000.3     | 0.868                               | AT5G01260.2               | Carbohydrate-binding-like fold                                                                      |
| Glyma.09G232800.1     | 0.870                               | AT5G04600.1               | RNA-binding (RRM/RBD/RNP motifs) family protein                                                     |
| Glyma.03G019200.2     | 0.870                               | AT2G45670.1               | calcineurin B subunit-related                                                                       |
| Glyma.09G069500.1     | 0.872                               | AT2G06025.1               | Acyl-CoA N-acyltransferases (NAT) superfamily protein                                               |
| Glyma.11G062300.1     | 0.872                               | AT4G36870.1               | BEL1-like homeodomain 2                                                                             |
| Glyma.19G001700.1     | 0.874                               | AT3G59990.1               | methionine aminopeptidase 2B                                                                        |
| Glyma.15G053900.1     | 0.877                               | AT5G09430.1               | alpha/beta-Hydrolases superfamily protein                                                           |
| Glyma.03G245000.1     | 0.878                               | AT1G54490.1               | exoribonuclease 4                                                                                   |
| Glyma.U020600.1       | 0.881                               | AT1G07910.1               | RNA ligase                                                                                          |
| Glyma.20G161800.1     | 0.883                               | AT4G09980.1               | Methyltransferase MT-A70 family protein                                                             |
| Glyma.17G156600.1     | 0.884                               |                           |                                                                                                     |
| Glyma.08G203400.3     | 0.884                               | AT1G79810.1               | Pex2/Pex12 N-terminal domain-containing protein / zinc finger (C3HC4-type RING finger) family prote |
| Glyma.08G155000.2     | 0.889                               | AT3G52110.2               |                                                                                                     |
| Glyma.10G043200.1     | 0.892                               | AT2G37570.1               | HSP20-like chaperones superfamily protein                                                           |
| Glyma.01G193200.1     | 0.892                               | AT5G67470.1               | formin homolog 6                                                                                    |
| Glyma.07G085900.1     | 0.893                               | AT5G19540.1               |                                                                                                     |
| Glyma.02G236600.1     | 0.895                               | AT5G58320.2               | Kinase interacting (KIP1-like) family protein                                                       |
| Glyma.16G195900.1     | 0.896                               | AT1G12300.1               | Tetratricopeptide repeat (TPR)-like superfamily protein                                             |
| Glyma.02G238700.1     | 0.901                               | AT5G10860.1               | Cystathionine beta-synthase (CBS) family protein                                                    |
| Glyma.04G208700.2     | 0.901                               | AT1G27990.1               |                                                                                                     |
| Glyma.02G094600.1     | 0.904                               | AT2G39490.1               | F-box family protein                                                                                |
| Glyma.06G117300.1     | 0.904                               | AT1G21640.1               | NAD kinase 2                                                                                        |
| Glyma.12G045900.1     | 0.905                               | AT1G49380.1               | cytochrome c biogenesis protein family                                                              |
| Glyma.16G161500.2     | 0.905                               | AT1G71710.2               | DNAse I-like superfamily protein                                                                    |
| Glyma.08G324200.1     | 0.906                               | AT5G55470.1               | Na <sup>+</sup> /H <sup>+</sup> (sodium hydrogen) exchanger 3                                       |
| Glyma.04G037100.1     | 0.906                               | AT1G47490.1               | RNA-binding protein 47C                                                                             |
| Glyma.03G210900.1     | 0.907                               | AT4G03200.1               | catalytics                                                                                          |
| Glyma.09G069500.2     | 0.907                               | AT2G06025.1               | Acyl-CoA N-acyltransferases (NAT) superfamily protein                                               |

|                   |       |             |                                                                                                    |
|-------------------|-------|-------------|----------------------------------------------------------------------------------------------------|
| Glyma.11G089900.1 | 0.908 | AT4G19185.1 | nodulin MtN21 /EamA-like transporter family protein                                                |
| Glyma.06G216700.1 | 0.909 | AT5G20070.1 | nudix hydrolase homolog 19                                                                         |
| Glyma.12G184300.1 | 0.909 | AT5G22460.1 | alpha/beta-Hydrolases superfamily protein                                                          |
| Glyma.08G149800.1 | 0.910 | AT1G17020.1 | senescence-related gene 1                                                                          |
| Glyma.15G201500.1 | 0.913 |             |                                                                                                    |
| Glyma.13G130800.1 | 0.915 | AT2G37570.1 | HSP20-like chaperones superfamily protein                                                          |
| Glyma.17G092400.1 | 0.915 | AT1G23820.1 | spermidine synthase 1                                                                              |
| Glyma.15G202000.1 | 0.917 | AT3G46920.1 | Protein kinase superfamily protein with octicosapeptide/Phox/Bem1p domain                          |
| Glyma.05G039500.1 | 0.917 | AT5G63060.1 | Sec14p-like phosphatidylinositol transfer family protein                                           |
| Glyma.05G116900.2 | 0.921 | AT4G21790.1 | tobamovirus multiplication 1                                                                       |
| Glyma.10G233300.1 | 0.923 | AT5G52420.1 |                                                                                                    |
| Glyma.09G215800.1 | 0.925 | AT4G34660.1 | SH3 domain-containing protein                                                                      |
| Glyma.12G204000.1 | 0.925 | AT1G03687.1 | DTW domain-containing protein                                                                      |
| Glyma.06G220400.1 | 0.927 | AT5G57930.2 | Arabidopsis thaliana protein of unknown function (DUF794)                                          |
| Glyma.20G016800.1 | 0.928 | AT1G15000.1 | serine carboxypeptidase-like 50                                                                    |
| Glyma.01G031800.1 | 0.928 | AT1G70300.1 | K+ uptake permease 6                                                                               |
| Glyma.06G024900.3 | 0.930 | AT1G47870.2 | winged-helix DNA-binding transcription factor family protein                                       |
| Glyma.20G130800.1 | 0.931 | AT3G19510.1 | Homeodomain-like protein with RING/FYVE/PHD-type zinc finger domain                                |
| Glyma.03G084300.1 | 0.931 | AT3G07250.1 | nuclear transport factor 2 (NTF2) family protein / RNA recognition motif (RRM)-containing protein  |
| Glyma.11G142700.1 | 0.933 | AT1G43860.1 | sequence-specific DNA binding transcription factors                                                |
| Glyma.07G270300.5 | 0.934 | AT3G13340.1 | Transducin/WD40 repeat-like superfamily protein                                                    |
| Glyma.15G193100.1 | 0.935 | AT5G58130.1 | RNA-binding (RRM/RBD/RNP motifs) family protein                                                    |
| Glyma.04G097400.1 | 0.937 | AT5G27460.1 | Tetratricopeptide repeat (TPR)-like superfamily protein                                            |
| Glyma.14G071900.3 | 0.938 | AT2G21520.1 | Sec14p-like phosphatidylinositol transfer family protein                                           |
| Glyma.02G007700.1 | 0.939 | AT4G01800.1 | Albino or Glassy Yellow 1                                                                          |
| Glyma.16G095400.1 | 0.939 |             |                                                                                                    |
| Glyma.15G202000.2 | 0.940 | AT3G46920.1 | Protein kinase superfamily protein with octicosapeptide/Phox/Bem1p domain                          |
| Glyma.14G054800.1 | 0.940 | AT3G56200.1 | Transmembrane amino acid transporter family protein                                                |
| Glyma.06G175800.1 | 0.940 | AT4G24750.1 | Rhodanese/Cell cycle control phosphatase superfamily protein                                       |
| Glyma.02G155200.1 | 0.940 | AT4G02460.1 | DNA mismatch repair protein, putative                                                              |
| Glyma.18G017300.4 | 0.941 | AT4G39870.1 | TLD-domain containing nucleolar protein                                                            |
| Glyma.10G082300.1 | 0.941 | AT2G35920.1 | RNA helicase family protein                                                                        |
| Glyma.05G001900.1 | 0.942 | AT3G59990.1 | methionine aminopeptidase 2B                                                                       |
| Glyma.12G029500.1 | 0.942 | AT1G60860.1 | ARF-GAP domain 2                                                                                   |
| Glyma.19G091100.1 | 0.943 | AT3G27090.1 | DCD (Development and Cell Death) domain protein                                                    |
| Glyma.09G063100.2 | 0.943 | AT2G19520.1 | Transducin family protein / WD-40 repeat family protein                                            |
| Glyma.17G089800.1 | 0.943 |             |                                                                                                    |
| Glyma.08G001100.2 | 0.945 | AT5G20680.1 | TRICHOME BIREFRINGENCE-LIKE 16                                                                     |
| Glyma.08G187100.2 | 0.945 | AT1G60995.1 |                                                                                                    |
| Glyma.20G246800.3 | 0.948 | AT5G13030.1 |                                                                                                    |
| Glyma.08G047400.3 | 0.950 | AT1G67970.1 | heat shock transcription factor A8                                                                 |
| Glyma.15G034600.1 | 0.951 | AT1G51340.2 | MATE efflux family protein                                                                         |
| Glyma.02G162500.2 | 0.953 | AT3G56680.1 | Single-stranded nucleic acid binding R3H protein                                                   |
| Glyma.13G034600.2 | 0.956 | AT1G21580.1 | Zinc finger C-x8-C-x5-C-x3-H type family protein                                                   |
| Glyma.04G082300.1 | 0.957 | AT4G32770.1 | tocopherol cyclase, chloroplast / vitamin E deficient 1 (VTE1) / sucrose export defective 1 (SXD1) |
| Glyma.08G308200.1 | 0.957 | AT1G06490.1 | glucan synthase-like 7                                                                             |
| Glyma.19G212800.1 | 0.958 | AT4G02280.1 | sucrose synthase 3                                                                                 |
| Glyma.09G138300.1 | 0.958 | AT5G23850.1 | Arabidopsis thaliana protein of unknown function (DUF821)                                          |
| Glyma.06G224400.1 | 0.958 |             |                                                                                                    |
| Glyma.04G225000.1 | 0.960 | AT3G14172.1 |                                                                                                    |
| Glyma.06G295600.1 | 0.961 |             |                                                                                                    |
| Glyma.01G115000.2 | 0.961 | AT5G01260.2 | Carbohydrate-binding-like fold                                                                     |
| Glyma.12G112100.1 | 0.961 |             |                                                                                                    |
| Glyma.17G002900.3 | 0.961 | AT2G02410.1 |                                                                                                    |
| Glyma.09G273600.2 | 0.962 | AT3G08720.1 | serine/threonine protein kinase 2                                                                  |
| Glyma.02G240500.1 | 0.962 | AT1G65910.1 | NAC domain containing protein 28                                                                   |
| Glyma.02G113700.1 | 0.963 | AT1G69340.1 | appr-1-p processing enzyme family protein                                                          |
| Glyma.02G291300.1 | 0.963 | AT3G20410.1 | calmodulin-domain protein kinase 9                                                                 |
| Glyma.13G218500.1 | 0.963 | AT5G46210.1 | cullin4                                                                                            |
| Glyma.14G120800.1 | 0.965 |             |                                                                                                    |
| Glyma.14G129400.1 | 0.966 | AT2G25660.1 | embryo defective 2410                                                                              |
| Glyma.14G154500.1 | 0.966 | AT4G19610.1 | nucleotide binding:nucleic acid binding:RNA binding                                                |
| Glyma.13G180900.1 | 0.966 | AT3G47160.1 | RING/U-box superfamily protein                                                                     |
| Glyma.20G148900.4 | 0.967 | AT3G22740.1 | homocysteine S-methyltransferase 3                                                                 |
| Glyma.17G085300.4 | 0.967 | AT5G63120.1 | P-loop containing nucleoside triphosphate hydrolases superfamily protein                           |
| Glyma.U038400.1   | 0.968 | AT4G07990.2 | Chaperone DnaJ-domain superfamily protein                                                          |
| Glyma.12G033700.1 | 0.970 | AT4G34830.1 | Pentatricopeptide repeat (PPR) superfamily protein                                                 |
| Glyma.04G059100.1 | 0.971 | AT5G24970.2 | Protein kinase superfamily protein                                                                 |
| Glyma.18G275600.1 | 0.972 | AT2G03890.1 | phosphoinositide 4-kinase gamma 7                                                                  |
| Glyma.06G198400.1 | 0.972 | AT3G52090.2 | DNA-directed RNA polymerase, RBP11-like                                                            |
| Glyma.19G101200.1 | 0.974 | AT1G04300.2 | TRAF-like superfamily protein                                                                      |
| Glyma.03G247900.1 | 0.974 | AT3G04650.1 | FAD/NAD(P)-binding oxidoreductase family protein                                                   |
| Glyma.09G281200.1 | 0.974 | AT2G39970.1 | Mitochondrial substrate carrier family protein                                                     |
| Glyma.09G088500.1 | 0.974 | AT4G18130.1 | phytochrome E                                                                                      |
| Glyma.06G316900.1 | 0.974 | AT5G04620.2 | biotin F                                                                                           |
| Glyma.16G059800.1 | 0.976 | AT5G20090.1 | Uncharacterised protein family (UPF0041)                                                           |
| Glyma.02G058500.1 | 0.976 | AT5G66730.1 | C2H2-like zinc finger protein                                                                      |
| Glyma.06G321300.2 | 0.977 | AT4G10100.1 | co-factor for nitrate, reductase and xanthine dehydrogenase 7                                      |
| Glyma.07G066700.1 | 0.977 | AT2G03690.1 | coenzyme Q biosynthesis Coq4 family protein / ubiquinone biosynthesis Coq4 family protein          |
| Glyma.05G249000.1 | 0.978 | AT3G17670.2 | tetratricopeptide repeat (TPR)-containing protein                                                  |
| Glyma.09G281300.1 | 0.979 | AT5G48655.1 | RING/U-box superfamily protein                                                                     |
| Glyma.05G240500.2 | 0.979 | AT1G67970.1 | heat shock transcription factor A8                                                                 |
| Glyma.11G257000.1 | 0.979 | AT1G62310.1 | transcription factor jumonji (jmc) domain-containing protein                                       |
| Glyma.10G042800.4 | 0.979 | AT2G20180.2 | phytochrome interacting factor 3-like 5                                                            |
| Glyma.02G158300.1 | 0.979 |             |                                                                                                    |
| Glyma.05G055700.1 | 0.980 | AT1G62710.1 | beta vacuolar processing enzyme                                                                    |
| Glyma.17G121300.1 | 0.984 |             |                                                                                                    |
| Glyma.10G143900.1 | 0.985 | AT3G62200.1 | Putative endonuclease or glycosyl hydrolase                                                        |
| Glyma.10G091300.1 | 0.986 | AT3G57910.1 | D111/G-patch domain-containing protein                                                             |

|                    |       |             |                                                                                              |
|--------------------|-------|-------------|----------------------------------------------------------------------------------------------|
| Glyma.11G200700.1  | 0.986 | AT2G30530.1 |                                                                                              |
| Glyma.15G073100.1  | 0.986 | AT4G27450.1 | Aluminium induced protein with YGL and LRDR motifs                                           |
| Glyma.09G233300.3  | 0.988 | AT5G61670.1 |                                                                                              |
| Glyma.02G173300.1  | 0.988 | AT4G32050.1 | neurochondrin family protein                                                                 |
| Glyma.10G071200.4  | 0.988 | AT2G36305.1 | farnesylated protein-converting enzyme 2                                                     |
| Glyma.04G029900.1  | 0.988 | AT4G39170.1 | Sec14p-like phosphatidylinositol transfer family protein                                     |
| Glyma.08G249500.1  | 0.989 | AT1G03940.1 | HXXXD-type acyl-transferase family protein                                                   |
| Glyma.05G205500.1  | 0.990 | AT1G63250.1 | DEA(D/H)-box RNA helicase family protein                                                     |
| Glyma.16G129200.4  | 0.990 | AT2G17990.1 |                                                                                              |
| Glyma.10G249800.3  | 0.991 | AT5G45190.1 | Cyclin family protein                                                                        |
| Glyma.06G149200.4  | 0.991 | AT5G09850.1 | Transcription elongation factor (TFIIS) family protein                                       |
| Glyma.13G052000.1  | 0.992 | AT5G15790.1 | RING/U-box superfamily protein                                                               |
| Glyma.11G039900.1  | 0.992 | AT4G17140.3 | pleckstrin homology (PH) domain-containing protein                                           |
| Glyma.03G045100.1  | 0.994 |             |                                                                                              |
| Glyma.17G156700.1  | 0.994 | AT4G21570.1 | Protein of unknown function (DUF300)                                                         |
| Glyma.19G045200.2  | 0.994 |             |                                                                                              |
| Glyma.19G132200.3  | 0.995 | AT3G10250.1 | Plant protein 1589 of unknown function                                                       |
| Glyma.03G043200.1  | 0.995 | AT3G14460.1 | LRR and NB-ARC domains-containing disease resistance protein                                 |
| Glyma.05G006000.2  | 0.998 | AT5G14670.1 | ADP-ribosylation factor A1B                                                                  |
| Glyma.U029100.1    | 0.998 |             |                                                                                              |
| Glyma.01G162200.2  | 1.000 | AT4G35800.1 | RNA polymerase II large subunit                                                              |
| Glyma.09G171000.2  | 1.000 | AT3G56990.1 | embryo sac development arrest 7                                                              |
| Glyma.11G024100.1  | 1.000 | AT4G11600.1 | glutathione peroxidase 6                                                                     |
| Glyma.15G158900.1  | 1.000 | AT1G06430.1 | FTSH protease 8                                                                              |
| Glyma.06G325400.1  | 1.001 | AT4G28360.1 | Ribosomal protein L22p/L17e family protein                                                   |
| Glyma.15G166700.1  | 1.002 | AT5G57160.1 | DNA ligase IV                                                                                |
| Glyma.11G104200.3  | 1.004 | AT5G64520.2 | homolog of X-ray repair cross complementing 2 (XRCC2)                                        |
| Glyma.12G135100.1  | 1.004 | AT4G27130.1 | Translation initiation factor SUI1 family protein                                            |
| Glyma.10G264400.10 | 1.004 | AT1G14650.1 | SWAP (Suppressor-of-White-Apricot)/surp domain-containing protein / ubiquitin family protein |
| Glyma.06G238400.1  | 1.005 | AT5G53900.2 | Serine/threonine-protein kinase WNK (With No Lysine)-related                                 |
| Glyma.04G237300.1  | 1.006 | AT5G53120.1 | spermidine synthase 3                                                                        |
| Glyma.13G262100.1  | 1.007 | AT3G14610.1 | cytochrome P450, family 72, subfamily A, polypeptide 7                                       |
| Glyma.10G137800.1  | 1.007 | AT4G01800.1 | Albino or Glassy Yellow 1                                                                    |
| Glyma.12G132300.1  | 1.008 | AT5G17680.1 | disease resistance protein (TIR-NBS-LRR class), putative                                     |
| Glyma.11G153500.1  | 1.009 | AT3G07530.1 |                                                                                              |
| Glyma.14G155600.1  | 1.010 | AT4G00440.2 | Protein of unknown function (DUF3741)                                                        |
| Glyma.10G031700.2  | 1.011 | AT4G20010.1 | plastid transcriptionally active 9                                                           |
| Glyma.13G075300.1  | 1.012 | AT4G12640.1 | RNA recognition motif (RRM)-containing protein                                               |
| Glyma.06G054000.1  | 1.012 | AT1G72770.1 | homology to ABI1                                                                             |
| Glyma.06G146200.1  | 1.014 | AT5G36930.2 | Disease resistance protein (TIR-NBS-LRR class) family                                        |
| Glyma.06G253700.2  | 1.014 | AT1G11200.1 | Protein of unknown function (DUF300)                                                         |
| Glyma.05G109100.1  | 1.014 | AT1G04300.2 | TRAF-like superfamily protein                                                                |
| Glyma.18G116400.2  | 1.015 | AT4G23820.1 | Pectin lyase-like superfamily protein                                                        |
| Glyma.04G215300.1  | 1.015 | AT1G49170.1 | Protein of unknown function (DUF167)                                                         |
| Glyma.15G180300.1  | 1.015 | AT4G38620.1 | myb domain protein 4                                                                         |
| Glyma.07G202300.1  | 1.016 | AT5G06900.1 | cytochrome P450, family 93, subfamily D, polypeptide 1                                       |
| Glyma.14G071700.2  | 1.016 | AT1G75380.1 | bifunctional nuclease in basal defense response 1                                            |
| Glyma.02G293200.3  | 1.017 | AT5G55100.2 | SWAP (Suppressor-of-White-Apricot)/surp domain-containing protein                            |
| Glyma.05G178900.4  | 1.017 | AT4G39850.1 | peroxisomal ABC transporter 1                                                                |
| Glyma.08G021200.1  | 1.018 | AT4G11110.1 | SPA1-related 2                                                                               |
| Glyma.20G127500.2  | 1.019 | AT4G34190.1 | stress enhanced protein 1                                                                    |
| Glyma.04G215200.1  | 1.019 | AT3G18750.1 | with no lysine (K) kinase 6                                                                  |
| Glyma.16G119000.1  | 1.020 | AT3G51430.1 | Calcium-dependent phosphotriesterase superfamily protein                                     |
| Glyma.06G293700.2  | 1.021 | AT2G20740.1 | Tetraspanin family protein                                                                   |
| Glyma.19G023200.1  | 1.021 | AT5G39660.1 | cycling DOF factor 2                                                                         |
| Glyma.20G200900.1  | 1.021 | AT4G26740.1 | seed gene 1                                                                                  |
| Glyma.06G293700.1  | 1.021 | AT2G20740.1 | Tetraspanin family protein                                                                   |
| Glyma.16G219200.1  | 1.023 | AT3G17740.1 |                                                                                              |
| Glyma.01G087900.1  | 1.024 | AT1G68830.1 | STT7 homolog STN7                                                                            |
| Glyma.12G171800.1  | 1.024 |             |                                                                                              |
| Glyma.17G150300.2  | 1.025 | AT5G55810.1 | nicotinate/nicotinamide mononucleotide adenylyltransferase                                   |
| Glyma.09G158200.1  | 1.025 | AT5G26360.1 | TCP-1/cpn60 chaperonin family protein                                                        |
| Glyma.09G104600.1  | 1.025 | AT5G06620.1 | SET domain protein 38                                                                        |
| Glyma.13G260300.1  | 1.025 | AT3G12250.1 | TGACG motif-binding factor 6                                                                 |
| Glyma.08G010800.1  | 1.025 | AT5G50600.1 | hydroxysteroid dehydrogenase 1                                                               |
| Glyma.10G165200.1  | 1.026 | AT3G04350.1 | Plant protein of unknown function (DUF946)                                                   |
| Glyma.12G169000.1  | 1.026 |             |                                                                                              |
| Glyma.19G051800.1  | 1.027 | AT3G16857.2 | response regulator 1                                                                         |
| Glyma.18G262500.1  | 1.027 | AT3G29090.1 | pectin methylesterase 31                                                                     |
| Glyma.20G099900.1  | 1.027 | AT5G23390.1 | Plant protein of unknown function (DUF639)                                                   |
| Glyma.16G081800.1  | 1.028 | AT3G14075.1 | Mono-/di-acylglycerol lipase, N-terminal:Lipase, class 3                                     |
| Glyma.08G160700.1  | 1.029 | AT3G12685.1 | Acid phosphatase/vanadium-dependent haloperoxidase-related protein                           |
| Glyma.05G174200.2  | 1.029 | AT3G26380.1 | Melibiose family protein                                                                     |
| Glyma.18G092700.1  | 1.030 | AT3G20800.1 | Cell differentiation, Rcd1-like protein                                                      |
| Glyma.07G148100.17 | 1.031 | AT5G01270.2 | carboxyl-terminal domain (ctd) phosphatase-like 2                                            |
| Glyma.12G003500.3  | 1.031 | AT5G61670.1 |                                                                                              |
| Glyma.01G234000.2  | 1.031 | AT4G17900.1 | PLATZ transcription factor family protein                                                    |
| Glyma.16G056600.1  | 1.032 | AT3G27090.1 | DCD (Development and Cell Death) domain protein                                              |
| Glyma.14G210000.1  | 1.032 | AT1G65910.1 | NAC domain containing protein 28                                                             |
| Glyma.18G275600.2  | 1.033 | AT2G03890.1 | phosphoinositide 4-kinase gamma 7                                                            |
| Glyma.17G026700.1  | 1.035 | AT4G02510.1 | translocon at the outer envelope membrane of chloroplasts 159                                |
| Glyma.02G010500.3  | 1.035 | AT3G62310.1 | RNA helicase family protein                                                                  |
| Glyma.19G127800.1  | 1.035 | AT5G05140.1 | Transcription elongation factor (TFIIS) family protein                                       |
| Glyma.03G190300.1  | 1.036 | AT5G12100.1 | pentatricopeptide (PPR) repeat-containing protein                                            |
| Glyma.06G030000.2  | 1.036 | AT2G21520.2 | Sec14p-like phosphatidylinositol transfer family protein                                     |
| Glyma.04G175900.2  | 1.036 | AT1G74780.1 | Nodulin-like / Major Facilitator Superfamily protein                                         |
| Glyma.16G096800.1  | 1.036 | AT5G06350.1 | ARM repeat superfamily protein                                                               |
| Glyma.08G220500.2  | 1.037 | AT4G30780.1 |                                                                                              |
| Glyma.08G247800.1  | 1.037 | AT5G28680.1 | Malectin/receptor-like protein kinase family protein                                         |

|                   |       |             |                                                                                                    |
|-------------------|-------|-------------|----------------------------------------------------------------------------------------------------|
| Glyma.09G260200.4 | 1.037 | AT1G01710.1 | Acyl-CoA thioesterase family protein                                                               |
| Glyma.18G074000.1 | 1.037 | AT4G26555.1 | FKBP-like peptidyl-prolyl cis-trans isomerase family protein                                       |
| Glyma.14G129300.2 | 1.038 | AT2G25660.1 | embryo defective 2410                                                                              |
| Glyma.09G183900.1 | 1.038 | AT3G18390.1 | CRS1 / YhbY (CRM) domain-containing protein                                                        |
| Glyma.03G077300.1 | 1.039 | AT3G09050.1 |                                                                                                    |
| Glyma.20G183100.1 | 1.040 | AT3G10370.1 | FAD-dependent oxidoreductase family protein                                                        |
| Glyma.17G109700.1 | 1.041 | AT5G20280.1 | sucrose phosphate synthase 1F                                                                      |
| Glyma.09G213000.1 | 1.041 |             |                                                                                                    |
| Glyma.02G165400.1 | 1.042 | AT2G28600.1 | P-loop containing nucleoside triphosphate hydrolases superfamily protein                           |
| Glyma.07G012400.2 | 1.042 | AT3G21290.1 | dentin sialophosphoprotein-related                                                                 |
| Glyma.02G216200.1 | 1.042 | AT2G38465.1 |                                                                                                    |
| Glyma.09G002600.1 | 1.042 | AT1G66340.1 | Signal transduction histidine kinase, hybrid-type, ethylene sensor                                 |
| Glyma.04G234400.1 | 1.042 | AT2G46550.2 |                                                                                                    |
| Glyma.20G088800.1 | 1.043 |             |                                                                                                    |
| Glyma.10G260400.1 | 1.043 | AT3G19510.1 | Homeodomain-like protein with RING/FYVE/PHD-type zinc finger domain                                |
| Glyma.09G030800.1 | 1.044 |             |                                                                                                    |
| Glyma.16G173300.1 | 1.044 |             |                                                                                                    |
| Glyma.08G334000.1 | 1.044 | AT3G46970.1 | alpha-glucan phosphorylase 2                                                                       |
| Glyma.11G004300.2 | 1.045 | AT5G19330.1 | ARM repeat protein interacting with ABF2                                                           |
| Glyma.13G197200.1 | 1.045 | AT3G55850.2 | Amidohydrolase family                                                                              |
| Glyma.08G305100.1 | 1.046 | AT4G19645.1 | TRAM, LAG1 and CLN8 (TLC) lipid-sensing domain containing protein                                  |
| Glyma.10G153000.1 | 1.047 | AT1G09060.1 | Zinc finger, RING-type;Transcription factor jumonji/aspartyl beta-hydroxylase                      |
| Glyma.05G166100.1 | 1.047 | AT1G30500.2 | nuclear factor Y, subunit A7                                                                       |
| Glyma.12G018800.1 | 1.047 | AT5G17070.1 |                                                                                                    |
| Glyma.18G255000.1 | 1.047 | AT5G15070.1 | Phosphoglycerate mutase-like family protein                                                        |
| Glyma.05G100500.1 | 1.048 | AT5G67320.1 | WD-40 repeat family protein                                                                        |
| Glyma.20G021900.2 | 1.048 | AT5G37340.1 | ZPR1 zinc-finger domain protein                                                                    |
| Glyma.15G255000.1 | 1.048 | AT1G04390.1 | BTB/POZ domain-containing protein                                                                  |
| Glyma.06G127700.4 | 1.049 | AT5G53450.1 | OBP3-responsive gene 1                                                                             |
| Glyma.17G199600.3 | 1.049 | AT2G45330.1 | RNA 2'-phosphotransferase, Tpt1 / KptA family                                                      |
| Glyma.03G182600.1 | 1.050 | AT2G36990.1 | RNA polymerase sigma-subunit F                                                                     |
| Glyma.04G068800.1 | 1.050 | AT4G32440.1 | Plant Tudor-like RNA-binding protein                                                               |
| Glyma.19G261200.2 | 1.050 | AT1G01040.1 | dicer-like 1                                                                                       |
| Glyma.16G035400.1 | 1.051 | AT3G09360.1 | Cyclin/Brf1-like TBP-binding protein                                                               |
| Glyma.05G091600.1 | 1.051 | AT2G25450.1 | 2-oxoglutarate (2OG) and Fe(II)-dependent oxygenase superfamily protein                            |
| Glyma.19G220000.1 | 1.051 | AT3G62240.1 | RING/U-box superfamily protein                                                                     |
| Glyma.13G345000.1 | 1.051 | AT4G21065.1 | Tetratricopeptide repeat (TPR)-like superfamily protein                                            |
| Glyma.19G203400.1 | 1.051 | AT3G54720.1 | Peptidase M28 family protein                                                                       |
| Glyma.10G050500.1 | 1.051 | AT2G37100.1 | protamine P1 family protein                                                                        |
| Glyma.12G068600.1 | 1.053 |             |                                                                                                    |
| Glyma.17G194600.1 | 1.053 | AT1G52190.1 | Major facilitator superfamily protein                                                              |
| Glyma.U039700.1   | 1.053 | AT4G25580.1 | CAP160 protein                                                                                     |
| Glyma.09G068800.1 | 1.054 | AT5G35560.1 | DENN (AEX-3) domain-containing protein                                                             |
| Glyma.09G145900.1 | 1.054 |             |                                                                                                    |
| Glyma.17G091700.1 | 1.055 | AT1G63800.1 | ubiquitin-conjugating enzyme 5                                                                     |
| Glyma.09G278600.1 | 1.056 | AT5G01760.1 | ENTH/VHS/GAT family protein                                                                        |
| Glyma.10G192500.1 | 1.056 |             |                                                                                                    |
| Glyma.17G002900.1 | 1.056 | AT2G02410.1 |                                                                                                    |
| Glyma.15G159000.1 | 1.057 | AT1G31120.1 | K+ uptake permease 10                                                                              |
| Glyma.14G071700.1 | 1.057 | AT1G75380.1 | bifunctional nuclease in basal defense response 1                                                  |
| Glyma.19G116700.1 | 1.058 | AT3G03710.1 | polyribonucleotide nucleotidyltransferase, putative                                                |
| Glyma.20G037400.2 | 1.058 | AT5G19430.1 | RING/U-box superfamily protein                                                                     |
| Glyma.08G320400.1 | 1.058 |             |                                                                                                    |
| Glyma.10G192400.1 | 1.058 | AT3G24180.1 | Beta-glucosidase, GBA2 type family protein                                                         |
| Glyma.04G210000.2 | 1.059 | AT5G09230.7 | sirtuin 2                                                                                          |
| Glyma.20G002000.4 | 1.059 | AT4G00370.1 | Major facilitator superfamily protein                                                              |
| Glyma.01G177000.1 | 1.060 | AT2G18540.1 | RmlC-like cupins superfamily protein                                                               |
| Glyma.17G173300.1 | 1.060 |             |                                                                                                    |
| Glyma.09G160500.1 | 1.060 | AT1G73190.1 | Aquaporin-like superfamily protein                                                                 |
| Glyma.08G020300.3 | 1.060 | AT4G11150.1 | vacuolar ATP synthase subunit E1                                                                   |
| Glyma.07G112100.1 | 1.060 | AT3G60400.1 | Mitochondrial transcription termination factor family protein                                      |
| Glyma.02G218600.2 | 1.061 | AT1G09960.1 | sucrose transporter 4                                                                              |
| Glyma.06G095500.3 | 1.061 | AT5G49970.1 | pyridoxin (pyridoxamine) 5'-phosphate oxidase                                                      |
| Glyma.20G064800.1 | 1.061 | AT4G15020.1 | hAT transposon superfamily                                                                         |
| Glyma.14G065600.1 | 1.061 | AT3G55610.1 | delta 1-pyrroline-5-carboxylate synthase 2                                                         |
| Glyma.14G150400.4 | 1.062 | AT5G24340.1 | 3'-5' exonuclease domain-containing protein                                                        |
| Glyma.13G180800.1 | 1.062 | AT4G17020.3 | transcription factor-related                                                                       |
| Glyma.09G184300.1 | 1.063 | AT3G12250.1 | TGACG motif-binding factor 6                                                                       |
| Glyma.07G025500.1 | 1.064 | AT1G80700.1 |                                                                                                    |
| Glyma.06G155200.1 | 1.064 | AT5G17850.1 | Sodium/calcium exchanger family protein                                                            |
| Glyma.11G069800.1 | 1.064 | AT5G66530.1 | Galactose mutarotase-like superfamily protein                                                      |
| Glyma.04G024500.1 | 1.064 | AT1G75730.1 |                                                                                                    |
| Glyma.13G174600.1 | 1.064 | AT5G24740.1 | Protein of unknown function (DUF1162)                                                              |
| Glyma.02G118500.1 | 1.064 | AT3G29575.1 | ABI five binding protein 3                                                                         |
| Glyma.01G227900.1 | 1.064 | AT4G10020.1 | hydroxysteroid dehydrogenase 5                                                                     |
| Glyma.09G247500.1 | 1.065 | AT1G65540.1 | LETM1-like protein                                                                                 |
| Glyma.20G088700.1 | 1.065 |             |                                                                                                    |
| Glyma.04G236400.1 | 1.065 | AT5G53420.1 | CCT motif family protein                                                                           |
| Glyma.11G097500.1 | 1.066 | AT4G38810.2 | Calcium-binding EF-hand family protein                                                             |
| Glyma.02G145300.1 | 1.066 | AT1G03090.2 | methylcrotonyl-CoA carboxylase alpha chain, mitochondrial / 3-methylcrotonyl-CoA carboxylase 1 (MC |
| Glyma.09G078400.1 | 1.066 | AT4G17010.1 |                                                                                                    |
| Glyma.03G204400.2 | 1.066 | AT5G22000.2 | RING-H2 group F2A                                                                                  |
| Glyma.12G006600.1 | 1.066 | AT1G29990.1 | prefoldin 6                                                                                        |
| Glyma.19G229700.2 | 1.067 | AT1G56300.1 | Chaperone DnaJ-domain superfamily protein                                                          |
| Glyma.05G122500.1 | 1.067 | AT4G15570.1 | P-loop containing nucleoside triphosphate hydrolases superfamily protein                           |
| Glyma.20G239000.1 | 1.068 | AT3G05700.1 | Drought-responsive family protein                                                                  |
| Glyma.16G095700.4 | 1.068 | AT4G26470.1 | Calcium-binding EF-hand family protein                                                             |
| Glyma.10G008700.1 | 1.068 | AT1G04300.1 | TRAF-like superfamily protein                                                                      |
| Glyma.02G291000.3 | 1.069 | AT1G50670.1 | OTU-like cysteine protease family protein                                                          |

|                    |       |             |                                                                           |
|--------------------|-------|-------------|---------------------------------------------------------------------------|
| Glyma.12G026200.1  | 1.070 | AT1G48840.1 | Plant protein of unknown function (DUF639)                                |
| Glyma.10G185400.1  | 1.071 | AT3G23070.1 | CRM family member 3A                                                      |
| Glyma.08G260200.1  | 1.071 | AT1G25480.1 | Aluminium activated malate transporter family protein                     |
| Glyma.10G260400.2  | 1.071 | AT3G19510.1 | Homeodomain-like protein with RING/FYVE/PHD-type zinc finger domain       |
| Glyma.07G232300.1  | 1.072 |             |                                                                           |
| Glyma.20G133300.1  | 1.072 | AT1G49970.1 | CLP protease proteolytic subunit 1                                        |
| Glyma.05G246200.1  | 1.072 | AT5G17400.1 | endoplasmic reticulum-adenine nucleotide transporter 1                    |
| Glyma.09G024300.1  | 1.073 | AT1G64760.1 | O-Glycosyl hydrolases family 17 protein                                   |
| Glyma.16G041600.1  | 1.073 | AT3G13460.1 | evolutionarily conserved C-terminal region 2                              |
| Glyma.06G128600.1  | 1.074 | AT5G24260.1 | prolyl oligopeptidase family protein                                      |
| Glyma.17G209500.2  | 1.074 | AT4G32400.1 | Mitochondrial substrate carrier family protein                            |
| Glyma.20G051100.1  | 1.074 | AT2G27090.1 | Protein of unknown function (DUF630 and DUF632)                           |
| Glyma.02G203200.4  | 1.074 | AT5G58160.1 | actin binding                                                             |
| Glyma.07G125200.2  | 1.075 | AT4G29380.1 | protein kinase family protein / WD-40 repeat family protein               |
| Glyma.09G095900.1  | 1.075 | AT3G46920.1 | Protein kinase superfamily protein with octicosapeptide/Phox/Bem1p domain |
| Glyma.10G276300.2  | 1.076 | AT1G25520.1 | Uncharacterized protein family (UPF0016)                                  |
| Glyma.05G050800.1  | 1.077 | AT5G09620.1 | Octicosapeptide/Phox/Bem1p family protein                                 |
| Glyma.05G248900.1  | 1.077 | AT1G17850.2 | Rhodanese/Cell cycle control phosphatase superfamily protein              |
| Glyma.06G158600.1  | 1.078 | AT3G45750.1 | Nucleotidyltransferase family protein                                     |
| Glyma.19G024000.1  | 1.078 | AT2G30280.1 | RNA-directed DNA methylation 4                                            |
| Glyma.15G182800.1  | 1.079 | AT3G43220.1 | Phosphoinositide phosphatase family protein                               |
| Glyma.16G115600.1  | 1.079 | AT1G13410.1 | Tetratricopeptide repeat (TPR)-like superfamily protein                   |
| Glyma.10G230000.1  | 1.079 | AT4G11260.1 | phosphatase-related                                                       |
| Glyma.06G060800.3  | 1.079 | AT4G31860.1 | Protein phosphatase 2C family protein                                     |
| Glyma.13G158800.1  | 1.080 | AT3G15880.2 | WUS-interacting protein 2                                                 |
| Glyma.05G141800.1  | 1.081 | AT5G46190.1 | RNA-binding KH domain-containing protein                                  |
| Glyma.10G140600.1  | 1.081 |             |                                                                           |
| Glyma.13G162200.1  | 1.081 | AT5G20300.1 | Avirulence induced gene (AIG1) family protein                             |
| Glyma.01G037700.5  | 1.081 | AT1G70100.3 |                                                                           |
| Glyma.06G221600.1  | 1.083 | AT5G58000.1 | Reticulon family protein                                                  |
| Glyma.08G235600.1  | 1.083 | AT1G16670.1 | Protein kinase superfamily protein                                        |
| Glyma.13G366600.1  | 1.084 | AT3G15920.1 | Phox (PX) domain-containing protein                                       |
| Glyma.05G022500.1  | 1.084 | AT5G07920.1 | diacylglycerol kinase1                                                    |
| Glyma.17G118000.2  | 1.085 | AT4G32440.2 | Plant Tudor-like RNA-binding protein                                      |
| Glyma.18G020900.13 | 1.085 | AT5G65210.1 | bZIP transcription factor family protein                                  |
| Glyma.10G207100.1  | 1.087 | AT3G54940.2 | Papain family cysteine protease                                           |
| Glyma.03G140600.1  | 1.087 |             |                                                                           |
| Glyma.20G050700.3  | 1.087 | AT3G14470.1 | NB-ARC domain-containing disease resistance protein                       |
| Glyma.20G230700.1  | 1.087 | AT5G27330.1 | Prefoldin chaperone subunit family protein                                |
| Glyma.14G023700.1  | 1.088 | AT1G50670.1 | OTU-like cysteine protease family protein                                 |
| Glyma.17G229600.3  | 1.088 | AT5G26040.2 | histone deacetylase 2                                                     |
| Glyma.05G016100.2  | 1.088 | AT5G23040.1 | Protein of unknown function (DUF3353)                                     |
| Glyma.01G128700.2  | 1.088 | AT2G38440.1 | SCAR homolog 2                                                            |
| Glyma.08G282400.8  | 1.089 | AT1G70620.3 | cyclin-related                                                            |
| Glyma.08G340000.2  | 1.089 | AT1G80770.1 | P-loop containing nucleoside triphosphate hydrolases superfamily protein  |
| Glyma.06G183100.1  | 1.089 | AT1G27510.1 | Protein of unknown function (DUF3506)                                     |
| Glyma.18G249500.1  | 1.090 |             |                                                                           |
| Glyma.U024900.1    | 1.090 | AT5G53900.2 | Serine/threonine-protein kinase WNK (With No Lysine)-related              |
| Glyma.10G241900.1  | 1.090 | AT5G62190.1 | DEAD box RNA helicase (PRH75)                                             |
| Glyma.11G104500.5  | 1.090 | AT1G10870.1 | ARF-GAP domain 4                                                          |
| Glyma.14G071800.1  | 1.091 |             |                                                                           |
| Glyma.04G209100.1  | 1.091 | AT5G09220.1 | amino acid permease 2                                                     |
| Glyma.17G014000.1  | 1.091 | AT1G50660.1 |                                                                           |
| Glyma.06G097100.1  | 1.091 | AT1G09710.1 | Homeodomain-like superfamily protein                                      |
| Glyma.15G200800.1  | 1.091 | AT2G41040.1 | S-adenosyl-L-methionine-dependent methyltransferases superfamily protein  |
| Glyma.15G023300.1  | 1.091 | AT3G27970.1 | Exonuclease family protein                                                |
| Glyma.08G226900.1  | 1.092 | AT1G60560.1 | SWIM zinc finger family protein                                           |
| Glyma.15G086400.1  | 1.093 | AT4G18880.1 | heat shock transcription factor A4A                                       |
| Glyma.18G074300.3  | 1.093 | AT3G13225.2 | WW domain-containing protein                                              |
| Glyma.15G064300.1  | 1.093 | AT1G11430.1 | plastid developmental protein DAG, putative                               |
| Glyma.04G161200.7  | 1.093 | AT2G19740.1 | Ribosomal protein L31e family protein                                     |
| Glyma.08G158600.3  | 1.093 | AT3G60070.1 | Major facilitator superfamily protein                                     |
| Glyma.20G215000.2  | 1.094 | AT3G55620.1 | Translation initiation factor IF6                                         |
| Glyma.18G233700.6  | 1.094 | AT3G61415.1 | SKP1-like 21                                                              |
| Glyma.08G131800.1  | 1.095 | AT1G67840.1 | chloroplast sensor kinase                                                 |
| Glyma.17G074200.1  | 1.095 | AT5G57990.1 | ubiquitin-specific protease 23                                            |
| Glyma.08G269700.2  | 1.095 | AT1G13580.2 | LAG1 longevity assurance homolog 3                                        |
| Glyma.19G143200.2  | 1.096 | AT1G51200.1 | A20/AN1-like zinc finger family protein                                   |
| Glyma.05G080300.5  | 1.096 | AT1G18470.2 | Transmembrane Fragile-X-F-associated protein                              |
| Glyma.09G202500.1  | 1.096 | AT4G37920.1 |                                                                           |
| Glyma.16G084000.1  | 1.097 | AT1G65620.1 | Lateral organ boundaries (LOB) domain family protein                      |
| Glyma.15G159000.3  | 1.097 | AT1G31120.1 | K+ uptake permease 10                                                     |
| Glyma.03G011000.1  | 1.098 | AT4G00710.1 | BR-signaling kinase 3                                                     |
| Glyma.02G279500.1  | 1.098 | AT5G19400.1 | Telomerase activating protein Est1                                        |
| Glyma.06G305900.1  | 1.099 | AT2G32415.1 | Polynucleotidyl transferase, ribonuclease H fold protein with HRDC domain |
| Glyma.17G146300.1  | 1.099 | AT4G17550.1 | Major facilitator superfamily protein                                     |
| Glyma.06G234200.1  | 1.099 | AT5G54080.1 | homogentisate 1,2-dioxygenase                                             |
| Glyma.15G145400.2  | 1.100 | AT5G49230.1 | Drought-responsive family protein                                         |
| Glyma.15G074900.2  | 1.100 | AT5G58950.1 | Protein kinase superfamily protein                                        |
| Glyma.10G257800.1  | 1.101 | AT1G49970.1 | CLP protease proteolytic subunit 1                                        |
| Glyma.06G172600.5  | 1.101 | AT1G13440.1 | glyceraldehyde-3-phosphate dehydrogenase C2                               |
| Glyma.09G151900.1  | 1.102 | AT5G62200.1 | Embryo-specific protein 3, (ATS3)                                         |
| Glyma.11G246100.1  | 1.102 | AT1G24440.1 | RING/U-box superfamily protein                                            |
| Glyma.15G225600.1  | 1.102 | AT2G21720.1 | Plant protein of unknown function (DUF639)                                |
| Glyma.19G175600.3  | 1.103 | AT3G09560.1 | Lipin family protein                                                      |
| Glyma.01G121100.1  | 1.103 | AT3G18350.1 | Plant protein of unknown function (DUF639)                                |
| Glyma.19G135000.4  | 1.103 | AT3G57280.1 | Transmembrane proteins 14C                                                |
| Glyma.13G006200.2  | 1.103 | AT3G07740.1 | homolog of yeast ADA2 2A                                                  |
| Glyma.06G269500.1  | 1.104 | AT4G27130.1 | Translation initiation factor SUII family protein                         |

|                    |       |             |                                                                          |
|--------------------|-------|-------------|--------------------------------------------------------------------------|
| Glyma.06G130800.1  | 1.104 | AT5G24314.1 | plastid transcriptionally active7                                        |
| Glyma.20G198000.2  | 1.104 | AT3G24180.1 | Beta-glucosidase, GBA2 type family protein                               |
| Glyma.02G111300.2  | 1.104 | AT1G13990.1 |                                                                          |
| Glyma.18G274000.1  | 1.105 | AT5G38895.3 | RING/U-box superfamily protein                                           |
| Glyma.20G089600.1  | 1.105 | AT5G26742.2 | DEAD box RNA helicase (RH3)                                              |
| Glyma.08G141300.1  | 1.105 | AT2G21970.1 | stress enhanced protein 2                                                |
| Glyma.15G136900.3  | 1.105 | AT5G49930.1 | zinc knuckle (CCHC-type) family protein                                  |
| Glyma.01G072000.4  | 1.105 | AT1G13570.1 | F-box/RNI-like superfamily protein                                       |
| Glyma.03G070200.2  | 1.106 | AT1G55510.1 | branched-chain alpha-keto acid decarboxylase E1 beta subunit             |
| Glyma.17G029000.1  | 1.106 | AT3G06780.1 | glycine-rich protein                                                     |
| Glyma.16G105200.2  | 1.106 | AT5G48340.1 |                                                                          |
| Glyma.06G018000.1  | 1.107 | AT2G36390.1 | starch branching enzyme 2.1                                              |
| Glyma.10G226300.2  | 1.107 | AT4G38470.1 | ACT-like protein tyrosine kinase family protein                          |
| Glyma.05G205200.2  | 1.108 | AT4G20330.1 | Transcription initiation factor TFIIE, beta subunit                      |
| Glyma.08G313500.1  | 1.108 | AT1G62310.1 | transcription factor jumonji (jnjC) domain-containing protein            |
| Glyma.09G236100.1  | 1.108 |             |                                                                          |
| Glyma.15G127700.1  | 1.108 | AT5G45160.1 | Root hair defective 3 GTP-binding protein (RHD3)                         |
| Glyma.08G266400.1  | 1.108 | AT5G11680.1 |                                                                          |
| Glyma.06G102800.1  | 1.109 | AT1G34780.1 | APR-like 4                                                               |
| Glyma.15G163600.4  | 1.109 | AT5G57330.1 | Galactose mutarotase-like superfamily protein                            |
| Glyma.07G162100.4  | 1.109 | AT5G12370.1 | exocyst complex component sec10                                          |
| Glyma.15G001600.1  | 1.109 | AT1G55730.1 | cation exchanger 5                                                       |
| Glyma.03G029300.1  | 1.109 | AT4G32760.2 | ENTH/VHS/GAT family protein                                              |
| Glyma.06G133000.3  | 1.109 | AT5G53550.1 | YELLOW STRIPE like 3                                                     |
| Glyma.05G218600.2  | 1.110 | AT5G46290.1 | 3-ketoacyl-acyl carrier protein synthase I                               |
| Glyma.06G060800.4  | 1.110 | AT4G31860.1 | Protein phosphatase 2C family protein                                    |
| Glyma.10G250500.1  | 1.110 | AT3G06010.1 | Homeotic gene regulator                                                  |
| Glyma.17G178700.1  | 1.110 | AT1G71710.1 | DNase 1-like superfamily protein                                         |
| Glyma.06G038100.1  | 1.110 | AT1G48840.1 | Plant protein of unknown function (DUF639)                               |
| Glyma.11G137100.2  | 1.111 | AT2G29190.1 | pumilio 2                                                                |
| Glyma.12G152700.1  | 1.111 | AT2G44760.1 | Domain of unknown function (DUF3598)                                     |
| Glyma.03G153800.1  | 1.112 | AT3G63120.1 | cyclin p1.1                                                              |
| Glyma.12G163500.9  | 1.112 | AT4G30580.1 | Phospholipid/glycerol acyltransferase family protein                     |
| Glyma.19G135200.1  | 1.112 | AT5G04000.2 |                                                                          |
| Glyma.03G180600.1  | 1.113 | AT1G16670.1 | Protein kinase superfamily protein                                       |
| Glyma.02G152900.1  | 1.113 | AT2G47890.1 | B-box type zinc finger protein with CCT domain                           |
| Glyma.10G284900.1  | 1.113 | AT3G19910.1 | RING/U-box superfamily protein                                           |
| Glyma.12G073300.2  | 1.113 | AT2G28550.1 | related to AP2.7                                                         |
| Glyma.16G072600.1  | 1.114 | AT5G62960.1 |                                                                          |
| Glyma.08G282400.1  | 1.114 |             |                                                                          |
| Glyma.09G164500.1  | 1.114 | AT1G65730.1 | YELLOW STRIPE like 7                                                     |
| Glyma.02G100000.1  | 1.114 | AT1G68830.1 | STT7 homolog STN7                                                        |
| Glyma.10G073900.1  | 1.115 |             |                                                                          |
| Glyma.08G274300.13 | 1.115 | AT2G25570.1 | binding                                                                  |
| Glyma.13G006200.4  | 1.116 | AT3G07740.1 | homolog of yeast ADA2 2A                                                 |
| Glyma.U007000.1    | 1.116 | AT1G75380.1 | bifunctional nuclease in basal defense response 1                        |
| Glyma.13G356200.1  | 1.116 | AT3G16260.1 | tRNAse Z4                                                                |
| Glyma.05G232700.1  | 1.117 | AT1G73920.1 | alpha/beta-Hydrolases superfamily protein                                |
| Glyma.12G093800.1  | 1.117 | AT3G44200.1 | NIMA (never in mitosis, gene A)-related 6                                |
| Glyma.11G040300.1  | 1.118 | AT1G32710.1 | Cytochrome c oxidase, subunit Vib family protein                         |
| Glyma.19G247100.1  | 1.119 | AT4G19400.1 | Profilin family protein                                                  |
| Glyma.06G037600.1  | 1.119 | AT1G47490.1 | RNA-binding protein 47C                                                  |
| Glyma.10G175300.2  | 1.119 | AT5G23490.1 |                                                                          |
| Glyma.08G167600.5  | 1.119 | AT1G16470.1 | proteasome subunit PAB1                                                  |
| Glyma.10G110200.1  | 1.119 | AT5G11240.1 | transducin family protein / WD-40 repeat family protein                  |
| Glyma.13G260200.1  | 1.120 |             |                                                                          |
| Glyma.13G169200.4  | 1.121 | AT5G40270.1 | HD domain-containing metal-dependent phosphohydrolase family protein     |
| Glyma.01G169800.1  | 1.121 | AT4G36400.1 | FAD-linked oxidases family protein                                       |
| Glyma.03G019200.1  | 1.121 | AT2G45670.1 | calcineurin B subunit-related                                            |
| Glyma.01G019100.2  | 1.121 | AT5G65685.1 | UDP-Glycosyltransferase superfamily protein                              |
| Glyma.16G057700.1  | 1.121 | AT3G27180.1 | S-adenosyl-L-methionine-dependent methyltransferases superfamily protein |
| Glyma.13G346900.2  | 1.121 | AT3G14010.1 | CTC-interacting domain 4                                                 |
| Glyma.11G245300.1  | 1.121 | AT1G24490.1 | OxaA/YidC-like membrane insertion protein                                |
| Glyma.09G235900.2  | 1.122 | AT5G15270.1 | RNA-binding KH domain-containing protein                                 |
| Glyma.10G267800.1  | 1.122 | AT1G71140.1 | MATE efflux family protein                                               |
| Glyma.11G040400.1  | 1.122 | AT2G44610.1 | Ras-related small GTP-binding family protein                             |
| Glyma.03G238000.1  | 1.122 | AT3G05340.1 | Tetratricopeptide repeat (TPR)-like superfamily protein                  |
| Glyma.09G147400.1  | 1.122 | AT4G25450.1 | non-intrinsic ABC protein 8                                              |
| Glyma.09G196200.1  | 1.122 | AT2G34750.1 | RNA polymerase I specific transcription initiation factor RRN3 protein   |
| Glyma.08G287800.1  | 1.123 | AT1G60220.1 | UB-like protease 1D                                                      |
| Glyma.07G195400.1  | 1.123 | AT3G47160.1 | RING/U-box superfamily protein                                           |
| Glyma.10G150500.1  | 1.123 | AT1G56230.1 | Protein of unknown function (DUF1399)                                    |
| Glyma.08G018100.1  | 1.125 | AT1G63980.2 | D111/G-patch domain-containing protein                                   |
| Glyma.10G298900.2  | 1.125 | AT2G33490.1 | hydroxyproline-rich glycoprotein family protein                          |
| Glyma.05G185300.1  | 1.125 | AT4G39420.2 |                                                                          |
| Glyma.07G148100.21 | 1.125 | AT5G01270.2 | carboxyl-terminal domain (ctd) phosphatase-like 2                        |
| Glyma.08G324000.2  | 1.126 | AT4G22360.1 | SWIB complex BAF60b domain-containing protein                            |
| Glyma.04G093100.1  | 1.126 | AT5G10940.2 | transducin family protein / WD-40 repeat family protein                  |
| Glyma.18G171400.2  | 1.126 | AT3G24800.1 | proteolysis 1                                                            |
| Glyma.06G105200.1  | 1.127 | AT1G78070.1 | Transducin/WD40 repeat-like superfamily protein                          |
| Glyma.06G064400.3  | 1.128 | AT2G25220.1 | Protein kinase superfamily protein                                       |
| Glyma.06G198600.1  | 1.128 | AT2G03430.1 | Ankyrin repeat family protein                                            |
| Glyma.02G296300.2  | 1.128 | AT4G26700.1 | fimbrin 1                                                                |
| Glyma.13G237200.1  | 1.128 | AT1G28320.1 | protease-related                                                         |
| Glyma.10G258700.1  | 1.128 | AT4G33905.1 | Peroxisomal membrane 22 kDa (Mpv17/PMP22) family protein                 |
| Glyma.04G112300.2  | 1.129 | AT1G55690.1 | Sec14p-like phosphatidylinositol transfer family protein                 |
| Glyma.09G183600.1  | 1.129 | AT1G48840.1 | Plant protein of unknown function (DUF639)                               |
| Glyma.11G246100.2  | 1.129 | AT1G24440.1 | RING/U-box superfamily protein                                           |
| Glyma.16G151700.1  | 1.129 | AT3G07750.1 | 3'-5'-exoribonuclease family protein                                     |

|                   |       |             |                                                                                 |
|-------------------|-------|-------------|---------------------------------------------------------------------------------|
| Glyma.09G171900.1 | 1.129 | AT1G48450.1 | Protein of unknown function (DUF760)                                            |
| Glyma.08G063700.1 | 1.129 | AT1G58440.1 | FAD/NAD(P)-binding oxidoreductase family protein                                |
| Glyma.15G277400.1 | 1.129 | AT1G62310.1 | transcription factor jumonji (jnjC) domain-containing protein                   |
| Glyma.09G240100.1 | 1.130 | AT5G39890.1 | Protein of unknown function (DUF1637)                                           |
| Glyma.13G065400.1 | 1.130 | AT5G62670.1 | H(+)-ATPase 11                                                                  |
| Glyma.03G099800.1 | 1.130 |             |                                                                                 |
| Glyma.05G242800.1 | 1.130 | AT1G48650.1 | DEA(D/H)-box RNA helicase family protein                                        |
| Glyma.20G123200.1 | 1.130 | AT1G22970.1 |                                                                                 |
| Glyma.20G152200.1 | 1.130 | AT5G62190.1 | DEAD box RNA helicase (PRH75)                                                   |
| Glyma.13G225700.1 | 1.130 | AT4G18880.1 | heat shock transcription factor A4A                                             |
| Glyma.04G128900.1 | 1.130 |             |                                                                                 |
| Glyma.01G164000.2 | 1.131 | AT4G35920.1 | PLAC8 family protein                                                            |
| Glyma.06G070400.4 | 1.132 | AT4G32440.3 | Plant Tudor-like RNA-binding protein                                            |
| Glyma.10G062200.1 | 1.132 | AT2G36760.1 | UDP-glucosyl transferase 73C2                                                   |
| Glyma.16G080900.6 | 1.132 | AT5G65940.1 | beta-hydroxyisobutyryl-CoA hydrolase 1                                          |
| Glyma.11G125000.3 | 1.132 | AT2G30710.1 | Ypt/Rab-GAP domain of gyp1p superfamily protein                                 |
| Glyma.08G204500.5 | 1.132 | AT1G79820.1 | Major facilitator superfamily protein                                           |
| Glyma.13G159900.3 | 1.133 | AT3G53270.1 | Small nuclear RNA activating complex (SNAPc), subunit SNAP43 protein            |
| Glyma.19G211900.2 | 1.133 | AT4G02340.1 | alpha/beta-Hydrolases superfamily protein                                       |
| Glyma.14G035200.1 | 1.133 | AT5G19400.1 | Telomerase activating protein Est1                                              |
| Glyma.17G179600.1 | 1.134 | AT1G09060.3 | Zinc finger, RING-type;Transcription factor jumonji/aspartyl beta-hydroxylase   |
| Glyma.16G025900.1 | 1.134 | AT1G01360.1 | regulatory component of ABA receptor 1                                          |
| Glyma.10G232300.1 | 1.134 | AT4G09980.1 | Methyltransferase MT-A70 family protein                                         |
| Glyma.06G156200.1 | 1.135 | AT2G01170.1 | bidirectional amino acid transporter 1                                          |
| Glyma.16G141200.3 | 1.135 | AT4G16580.1 | Protein phosphatase 2C family protein                                           |
| Glyma.13G194800.1 | 1.135 | AT1G64070.1 | Disease resistance protein (TIR-NBS-LRR class) family                           |
| Glyma.20G222900.1 | 1.136 | AT1G08610.1 | Pentatricopeptide repeat (PPR) superfamily protein                              |
| Glyma.14G078800.2 | 1.136 | AT3G13690.1 | Protein kinase protein with adenine nucleotide alpha hydrolases-like domain     |
| Glyma.14G129500.1 | 1.137 | AT2G25660.1 | embryo defective 2410                                                           |
| Glyma.17G236600.1 | 1.137 | AT5G43130.2 | TBP-associated factor 4                                                         |
| Glyma.06G033800.3 | 1.138 | AT1G80950.1 | Phospholipid/glycerol acyltransferase family protein                            |
| Glyma.13G146900.2 | 1.138 | AT4G32180.1 | pantothenate kinase 2                                                           |
| Glyma.06G059800.1 | 1.139 | AT5G24970.2 | Protein kinase superfamily protein                                              |
| Glyma.09G057700.1 | 1.139 | AT1G17690.1 |                                                                                 |
| Glyma.10G081500.1 | 1.139 | AT5G06370.1 | NC domain-containing protein-related                                            |
| Glyma.11G015800.1 | 1.139 | AT1G50460.1 | hexokinase-like 1                                                               |
| Glyma.U022000.2   | 1.140 | AT3G45630.1 | RNA binding (RRM/RBD/RNP motifs) family protein                                 |
| Glyma.17G046700.1 | 1.140 | AT3G43110.1 |                                                                                 |
| Glyma.06G015800.1 | 1.140 | AT1G42960.1 |                                                                                 |
| Glyma.06G218300.3 | 1.140 | AT1G31190.1 | myo-inositol monophosphatase like 1                                             |
| Glyma.14G089900.1 | 1.140 | AT1G60560.1 | SWIM zinc finger family protein                                                 |
| Glyma.01G212200.3 | 1.140 | AT1G12360.1 | Sec1/munc18-like (SM) proteins superfamily                                      |
| Glyma.10G213800.1 | 1.140 |             |                                                                                 |
| Glyma.06G088500.2 | 1.140 | AT4G32850.5 | nuclear poly(a) polymerase                                                      |
| Glyma.15G004900.2 | 1.141 | AT1G80570.2 | RNI-like superfamily protein                                                    |
| Glyma.12G214800.1 | 1.141 | AT3G20680.1 | Domain of unknown function (DUF1995)                                            |
| Glyma.12G220000.1 | 1.141 | AT4G27390.1 |                                                                                 |
| Glyma.13G116200.2 | 1.142 | AT2G04690.1 | Pyridoxamine 5'-phosphate oxidase family protein                                |
| Glyma.14G017400.1 | 1.142 | AT4G26700.1 | fimbrin 1                                                                       |
| Glyma.18G096800.1 | 1.143 | AT4G27010.1 |                                                                                 |
| Glyma.16G112800.1 | 1.143 | AT2G34750.1 | RNA polymerase I specific transcription initiation factor RRN3 protein          |
| Glyma.10G026500.1 | 1.143 |             |                                                                                 |
| Glyma.09G024600.3 | 1.143 | AT2G34730.1 | myosin heavy chain-related                                                      |
| Glyma.19G019200.1 | 1.144 | AT5G62670.1 | H(+)-ATPase 11                                                                  |
| Glyma.03G226600.1 | 1.144 | AT5G26742.2 | DEAD box RNA helicase (RH3)                                                     |
| Glyma.03G148700.1 | 1.144 | AT1G03380.1 | homolog of yeast autophagy 18 (ATG18) G                                         |
| Glyma.20G161800.2 | 1.144 | AT4G09980.1 | Methyltransferase MT-A70 family protein                                         |
| Glyma.09G164600.2 | 1.144 | AT1G48380.1 | root hair initiation protein root hairless 1 (RHL1)                             |
| Glyma.10G140900.1 | 1.145 | AT5G26742.1 | DEAD box RNA helicase (RH3)                                                     |
| Glyma.08G246400.1 | 1.145 | AT3G29575.1 | ABI five binding protein 3                                                      |
| Glyma.10G029800.1 | 1.145 | AT5G19840.1 | 2-oxoglutarate (2OG) and Fe(II)-dependent oxygenase superfamily protein         |
| Glyma.06G270600.1 | 1.145 | AT4G24320.1 | Ubiquitin carboxyl-terminal hydrolase family protein                            |
| Glyma.17G152700.3 | 1.145 | AT4G18030.1 | S-adenosyl-L-methionine-dependent methyltransferases superfamily protein        |
| Glyma.08G196700.1 | 1.145 | AT1G73020.1 |                                                                                 |
| Glyma.10G207700.1 | 1.145 | AT3G10370.1 | FAD-dependent oxidoreductase family protein                                     |
| Glyma.09G234500.1 | 1.146 | AT1G31480.1 | shoot gravitropism 2 (SGR2)                                                     |
| Glyma.03G132500.1 | 1.146 | AT1G73180.1 | Eukaryotic translation initiation factor eIF2A family protein                   |
| Glyma.02G296300.1 | 1.146 | AT4G26700.1 | fimbrin 1                                                                       |
| Glyma.17G234900.2 | 1.146 | AT5G63905.1 |                                                                                 |
| Glyma.09G112500.1 | 1.146 | AT5G13020.1 | Emsy N Terminus (ENT)/ plant Tudor-like domains-containing protein              |
| Glyma.15G237300.1 | 1.146 | AT3G61790.1 | Protein with RING/U-box and TRAF-like domains                                   |
| Glyma.17G235100.5 | 1.147 | AT1G27760.3 | interferon-related developmental regulator family protein / IFRD protein family |
| Glyma.11G127400.1 | 1.147 | AT3G59470.1 | Far-red impaired responsive (FAR1) family protein                               |
| Glyma.03G006700.1 | 1.147 | AT3G03630.1 | cysteine synthase 26                                                            |
| Glyma.10G168000.1 | 1.147 | AT3G04260.1 | plastid transcriptionally active 3                                              |
| Glyma.06G146700.2 | 1.147 | AT4G39520.1 | GTP-binding protein-related                                                     |
| Glyma.20G037400.1 | 1.147 | AT5G19430.1 | RING/U-box superfamily protein                                                  |
| Glyma.19G180100.1 | 1.148 |             |                                                                                 |
| Glyma.09G196000.1 | 1.149 | AT1G76490.1 | hydroxy methylglutaryl CoA reductase 1                                          |
| Glyma.10G065700.1 | 1.149 | AT3G52940.1 | Ergosterol biosynthesis ERG4/ERG24 family                                       |
| Glyma.17G253900.2 | 1.149 | AT5G57960.1 | GTP-binding protein, HflX                                                       |
| Glyma.05G166600.1 | 1.150 | AT3G13460.1 | evolutionarily conserved C-terminal region 2                                    |
| Glyma.16G071100.1 | 1.150 | AT2G47300.2 | ribonuclease Ps                                                                 |
| Glyma.08G136400.2 | 1.150 | AT4G39850.1 | peroxisomal ABC transporter 1                                                   |
| Glyma.13G060000.1 | 1.150 | AT1G61040.1 | plus-3 domain-containing protein                                                |
| Glyma.13G241800.1 | 1.150 | AT4G21660.1 | proline-rich spliceosome-associated (PSP) family protein                        |
| Glyma.12G132400.1 | 1.151 | AT5G17680.1 | disease resistance protein (TIR-NBS-LRR class), putative                        |
| Glyma.10G292600.1 | 1.151 |             |                                                                                 |
| Glyma.12G082100.1 | 1.151 | AT3G44880.1 | Pheophorbide a oxygenase family protein with Rieske [2Fe-2S] domain             |

|                    |       |             |                                                                                                      |
|--------------------|-------|-------------|------------------------------------------------------------------------------------------------------|
| Glyma.12G227600.3  | 1.151 | AT1G53200.1 |                                                                                                      |
| Glyma.06G039200.4  | 1.152 | AT3G09560.1 | Lipin family protein                                                                                 |
| Glyma.06G207700.1  | 1.152 | AT3G52140.2 | tetratricopeptide repeat (TPR)-containing protein                                                    |
| Glyma.10G043300.1  | 1.152 | AT2G37570.1 | HSP20-like chaperones superfamily protein                                                            |
| Glyma.05G194100.1  | 1.152 | AT3G52430.1 | alpha/beta-Hydrolases superfamily protein                                                            |
| Glyma.09G080900.1  | 1.152 | AT1G47330.1 | CBS domain-containing protein with a domain of unknown function (DUF21)                              |
| Glyma.13G204700.2  | 1.153 | AT1G11720.2 | starch synthase 3                                                                                    |
| Glyma.05G074800.1  | 1.153 | AT5G14260.1 | Rubisco methyltransferase family protein                                                             |
| Glyma.19G005500.1  | 1.153 | AT1G50170.1 | sirohydrochlorin ferrochelatase B                                                                    |
| Glyma.01G213700.1  | 1.153 | AT1G62960.1 | ACC synthase 10                                                                                      |
| Glyma.16G088000.2  | 1.153 | AT3G25230.1 | rotamase FKBP 1                                                                                      |
| Glyma.06G271900.1  | 1.153 |             |                                                                                                      |
| Glyma.10G084300.3  | 1.153 | AT5G26760.2 |                                                                                                      |
| Glyma.17G128200.5  | 1.153 | AT1G67580.1 | Protein kinase superfamily protein                                                                   |
| Glyma.01G161400.3  | 1.154 | AT4G35760.1 | NAD(P)H dehydrogenase (quinone)s                                                                     |
| Glyma.08G244600.1  | 1.154 | AT3G02100.1 | UDP-Glycosyltransferase superfamily protein                                                          |
| Glyma.U045500.1    | 1.155 | AT1G68890.1 | magnesium ion binding;thiamin pyrophosphate binding;hydro-lyases;catalytics;2-succinyl-5-enolpyruvyl |
| Glyma.12G205800.2  | 1.155 | AT5G44240.2 | aminophospholipid ATPase 2                                                                           |
| Glyma.10G171600.1  | 1.155 | AT5G47520.1 | RAB GTPase homolog A5A                                                                               |
| Glyma.17G080100.4  | 1.155 | AT1G18610.1 | Galactose oxidase/kelch repeat superfamily protein                                                   |
| Glyma.05G152100.3  | 1.155 | AT4G13930.1 | serine hydroxymethyltransferase 4                                                                    |
| Glyma.09G025100.1  | 1.156 | AT4G20930.1 | 6-phosphogluconate dehydrogenase family protein                                                      |
| Glyma.04G059000.1  | 1.156 | AT4G31750.1 | HOPW1-1-interacting 2                                                                                |
| Glyma.07G076000.2  | 1.156 | AT2G31890.1 | RAP                                                                                                  |
| Glyma.08G135900.1  | 1.156 | AT4G39870.1 | TLD-domain containing nucleolar protein                                                              |
| Glyma.10G292400.3  | 1.156 | AT5G13590.1 |                                                                                                      |
| Glyma.17G074500.1  | 1.156 | AT2G25050.1 | Actin-binding FH2 (Formin Homology) protein                                                          |
| Glyma.10G286100.1  | 1.157 | AT3G55870.1 | ADC synthase superfamily protein                                                                     |
| Glyma.12G015100.2  | 1.157 | AT1G22440.1 | Zinc-binding alcohol dehydrogenase family protein                                                    |
| Glyma.05G212000.3  | 1.157 | AT4G11270.1 | Transducin/WD40 repeat-like superfamily protein                                                      |
| Glyma.13G106700.17 | 1.157 | AT2G19390.1 |                                                                                                      |
| Glyma.16G077900.2  | 1.157 | AT1G35190.1 | 2-oxoglutarate (2OG) and Fe(II)-dependent oxygenase superfamily protein                              |
| Glyma.17G254400.3  | 1.157 | AT2G45330.2 | RNA 2'-phosphotransferase, Tpt1 / KptA family                                                        |
| Glyma.10G149200.1  | 1.158 | AT3G05700.1 | Drought-responsive family protein                                                                    |
| Glyma.10G233100.1  | 1.158 | AT4G23430.2 | NAD(P)-binding Rossmann-fold superfamily protein                                                     |
| Glyma.01G212000.1  | 1.158 | AT4G12130.1 | Glycine cleavage T-protein family                                                                    |
| Glyma.15G166700.3  | 1.158 | AT5G57160.1 | DNA ligase IV                                                                                        |
| Glyma.08G196100.1  | 1.158 | AT3G21290.1 | dentin sialophosphoprotein-related                                                                   |
| Glyma.20G086700.3  | 1.159 | AT1G04300.1 | TRAF-like superfamily protein                                                                        |
| Glyma.13G193200.1  | 1.159 | AT2G32940.1 | Argonaute family protein                                                                             |
| Glyma.01G165300.1  | 1.159 | AT2G17850.1 | Rhodanese/Cell cycle control phosphatase superfamily protein                                         |
| Glyma.10G165000.1  | 1.159 | AT1G08600.2 | P-loop containing nucleoside triphosphate hydrolases superfamily protein                             |
| Glyma.08G020300.2  | 1.159 | AT4G11150.1 | vacuolar ATP synthase subunit E1                                                                     |
| Glyma.05G193700.1  | 1.159 |             |                                                                                                      |
| Glyma.11G246800.1  | 1.159 |             |                                                                                                      |
| Glyma.08G035400.1  | 1.159 | AT1G67280.1 | Glyoxalase/Bleomycin resistance protein/Dioxygenase superfamily protein                              |
| Glyma.06G127000.2  | 1.159 | AT3G52210.1 | S-adenosyl-L-methionine-dependent methyltransferases superfamily protein                             |
| Glyma.06G170700.1  | 1.160 | AT3G48530.1 | SNF1-related protein kinase regulatory subunit gamma 1                                               |
| Glyma.15G064300.2  | 1.160 | AT1G11430.1 | plastid developmental protein DAG, putative                                                          |
| Glyma.04G060300.4  | 1.160 | AT4G31860.1 | Protein phosphatase 2C family protein                                                                |
| Glyma.03G178300.3  | 1.160 | AT2G37090.1 | Nucleotide-diphospho-sugar transferases superfamily protein                                          |
| Glyma.12G171900.1  | 1.160 | AT4G26970.1 | aconitase 2                                                                                          |
| Glyma.07G179900.1  | 1.160 | AT3G19010.1 | 2-oxoglutarate (2OG) and Fe(II)-dependent oxygenase superfamily protein                              |
| Glyma.13G259300.2  | 1.161 | AT1G17130.1 | Family of unknown function (DUF572)                                                                  |
| Glyma.04G083900.1  | 1.161 | AT5G11600.1 |                                                                                                      |
| Glyma.14G030400.2  | 1.161 | AT1G06570.1 | phytoene desaturation 1                                                                              |
| Glyma.10G171700.2  | 1.162 | AT1G65580.1 | Endonuclease/exonuclease/phosphatase family protein                                                  |
| Glyma.13G287000.3  | 1.162 | AT5G54730.1 | homolog of yeast autophagy 18 (ATG18) F                                                              |
| Glyma.09G002600.5  | 1.162 | AT1G66340.1 | Signal transduction histidine kinase, hybrid-type, ethylene sensor                                   |
| Glyma.06G315300.1  | 1.163 | AT2G20495.1 |                                                                                                      |
| Glyma.15G034000.1  | 1.163 | AT4G34890.1 | xanthine dehydrogenase 1                                                                             |
| Glyma.06G044900.2  | 1.163 | AT1G27700.1 | Syntaxin/t-SNARE family protein                                                                      |
| Glyma.15G072700.3  | 1.164 | AT5G01520.1 | RING/U-box superfamily protein                                                                       |
| Glyma.08G145100.1  | 1.164 | AT4G39370.1 | ubiquitin-specific protease 27                                                                       |
| Glyma.18G001500.2  | 1.164 | AT1G04830.2 | Ypt/Rab-GAP domain of gyp1p superfamily protein                                                      |
| Glyma.10G223300.4  | 1.165 | AT1G43190.1 | polypyrimidine tract-binding protein 3                                                               |
| Glyma.09G169600.1  | 1.165 | AT3G17740.1 |                                                                                                      |
| Glyma.04G166400.1  | 1.165 |             |                                                                                                      |
| Glyma.12G227600.1  | 1.166 | AT1G53200.1 |                                                                                                      |
| Glyma.10G076700.1  | 1.166 | AT2G37340.1 | arginine/serine-rich zinc knuckle-containing protein 33                                              |
| Glyma.13G337800.1  | 1.166 | AT2G29070.2 | Ubiquitin fusion degradation UFD1 family protein                                                     |
| Glyma.04G235700.1  | 1.166 | AT3G61790.1 | Protein with RING/U-box and TRAF-like domains                                                        |
| Glyma.13G131800.1  | 1.166 | AT2G37520.1 | Acyl-CoA N-acyltransferase with RING/FYVE/PHD-type zinc finger domain                                |
| Glyma.17G118300.1  | 1.166 | AT2G26650.1 | K+ transporter 1                                                                                     |
| Glyma.06G129000.1  | 1.166 | AT3G61790.1 | Protein with RING/U-box and TRAF-like domains                                                        |
| Glyma.20G009800.1  | 1.167 | AT4G37180.1 | Homeodomain-like superfamily protein                                                                 |
| Glyma.07G040500.1  | 1.167 | AT3G14075.1 | Mono-/di-acylglycerol lipase, N-terminal;Lipase, class 3                                             |
| Glyma.19G229700.3  | 1.167 | AT1G56300.1 | Chaperone DnaJ-domain superfamily protein                                                            |
| Glyma.20G168400.1  | 1.167 | AT1G43190.1 | polypyrimidine tract-binding protein 3                                                               |
| Glyma.11G104200.1  | 1.167 | AT5G64520.2 | homolog of X-ray repair cross complementing 2 (XRCC2)                                                |
| Glyma.04G238200.1  | 1.168 | AT5G24120.1 | sigma factor E                                                                                       |
| Glyma.10G001500.1  | 1.168 | AT3G23020.1 | Tetratricopeptide repeat (TPR)-like superfamily protein                                              |
| Glyma.16G134900.3  | 1.168 | AT5G66470.1 | RNA binding;GTP binding                                                                              |
| Glyma.06G060500.1  | 1.168 | AT1G63770.3 | Peptidase M1 family protein                                                                          |
| Glyma.08G308800.1  | 1.168 | AT1G06500.1 |                                                                                                      |
| Glyma.19G180000.2  | 1.168 | AT2G37150.1 | RING/U-box superfamily protein                                                                       |
| Glyma.02G144300.1  | 1.168 | AT5G19840.1 | 2-oxoglutarate (2OG) and Fe(II)-dependent oxygenase superfamily protein                              |
| Glyma.10G249700.1  | 1.169 | AT3G05970.1 | long-chain acyl-CoA synthetase 6                                                                     |
| Glyma.10G047600.1  | 1.169 | AT5G12130.1 | integral membrane TerC family protein                                                                |

|                    |       |             |                                                                                          |
|--------------------|-------|-------------|------------------------------------------------------------------------------------------|
| Glyma.10G114500.1  | 1.170 | AT3G56680.1 | Single-stranded nucleic acid binding R3H protein                                         |
| Glyma.03G066000.1  | 1.170 | AT3G09310.1 |                                                                                          |
| Glyma.09G223900.1  | 1.170 | AT3G10110.1 | Mitochondrial import inner membrane translocase subunit Tim17/Tim22/Tim23 family protein |
| Glyma.01G145700.1  | 1.170 | AT5G19350.1 | RNA-binding (RRM/RBD/RNP motifs) family protein                                          |
| Glyma.13G281300.1  | 1.170 | AT4G27390.1 |                                                                                          |
| Glyma.19G079900.1  | 1.170 | AT2G36330.1 | Uncharacterised protein family (UPF0497)                                                 |
| Glyma.06G156000.1  | 1.170 | AT5G09230.7 | sirtuin 2                                                                                |
| Glyma.16G025500.1  | 1.170 | AT2G46420.1 | Plant protein 1589 of unknown function                                                   |
| Glyma.05G156500.1  | 1.170 | AT3G25910.1 | Protein of unknown function (DUF1644)                                                    |
| Glyma.05G204700.1  | 1.170 | AT1G12780.1 | UDP-D-glucose/UDP-D-galactose 4-epimerase 1                                              |
| Glyma.14G094300.1  | 1.171 |             |                                                                                          |
| Glyma.06G276800.2  | 1.171 | AT2G30990.1 | Protein of unknown function (DUF688)                                                     |
| Glyma.17G167900.1  | 1.171 | AT5G67240.1 | small RNA degrading nuclease 3                                                           |
| Glyma.10G148400.1  | 1.171 |             |                                                                                          |
| Glyma.U045400.1    | 1.171 | AT1G62310.1 | transcription factor jumonji (jmc) domain-containing protein                             |
| Glyma.09G095300.1  | 1.171 | AT4G02480.1 | AAA-type ATPase family protein                                                           |
| Glyma.08G035700.1  | 1.172 | AT4G28880.1 | casein kinase I-like 3                                                                   |
| Glyma.15G031100.1  | 1.172 | AT2G31510.1 | IBR domain-containing protein                                                            |
| Glyma.09G036900.1  | 1.172 |             |                                                                                          |
| Glyma.10G243000.1  | 1.172 | AT1G04210.1 | Leucine-rich repeat protein kinase family protein                                        |
| Glyma.U018300.2    | 1.172 | AT5G13800.1 | pheophytinase                                                                            |
| Glyma.10G025000.1  | 1.173 | AT4G02880.2 |                                                                                          |
| Glyma.06G249300.1  | 1.173 | AT3G15520.1 | Cyclophilin-like peptidyl-prolyl cis-trans isomerase family protein                      |
| Glyma.06G316900.2  | 1.173 | AT5G04620.2 | biotin F                                                                                 |
| Glyma.06G138000.1  | 1.173 | AT3G49490.1 |                                                                                          |
| Glyma.18G001500.3  | 1.173 | AT1G04830.1 | Ypt/Rab-GAP domain of gyp1p superfamily protein                                          |
| Glyma.15G228600.2  | 1.173 | AT1G09220.1 | Pentatricopeptide repeat (PPR) superfamily protein                                       |
| Glyma.08G112000.1  | 1.174 | AT1G04850.1 | ubiquitin-associated (UBA)/TS-N domain-containing protein                                |
| Glyma.10G250100.2  | 1.174 | AT5G19330.1 | ARM repeat protein interacting with ABF2                                                 |
| Glyma.17G203700.1  | 1.174 | AT5G11490.2 | adaptin family protein                                                                   |
| Glyma.05G228700.2  | 1.174 | AT4G28880.1 | casein kinase I-like 3                                                                   |
| Glyma.01G010300.2  | 1.174 | AT1G32050.1 | SCAMP family protein                                                                     |
| Glyma.09G188300.1  | 1.174 | AT4G13350.1 | NSP (nuclear shuttle protein)-interacting GTPase                                         |
| Glyma.10G001200.5  | 1.174 | AT1G02680.1 | TBP-associated factor 13                                                                 |
| Glyma.08G178600.1  | 1.175 | AT5G09430.1 | alpha/beta-Hydrolases superfamily protein                                                |
| Glyma.06G087500.1  | 1.175 | AT2G25760.1 | Protein kinase family protein                                                            |
| Glyma.08G303200.1  | 1.175 | AT4G23820.1 | Pectin lyase-like superfamily protein                                                    |
| Glyma.02G312000.1  | 1.175 | AT4G35335.1 | Nucleotide-sugar transporter family protein                                              |
| Glyma.09G198400.1  | 1.176 | AT4G16444.1 |                                                                                          |
| Glyma.19G157700.1  | 1.177 | AT2G32100.1 | ovate family protein 16                                                                  |
| Glyma.08G267400.1  | 1.177 | AT1G64230.4 | ubiquitin-conjugating enzyme 28                                                          |
| Glyma.09G192400.3  | 1.177 | AT4G28990.2 | RNA-binding protein-related                                                              |
| Glyma.04G076700.1  | 1.177 | AT1G17370.1 | oligouridylation binding protein 1B                                                      |
| Glyma.20G179900.2  | 1.177 | AT5G17530.3 | phosphoglucosamine mutase family protein                                                 |
| Glyma.12G082400.1  | 1.177 | AT2G27950.1 | Ring/U-Box superfamily protein                                                           |
| Glyma.13G222300.2  | 1.178 | AT4G32520.1 | serine hydroxymethyltransferase 3                                                        |
| Glyma.07G092600.1  | 1.178 | AT1G48840.1 | Plant protein of unknown function (DUF639)                                               |
| Glyma.02G265100.11 | 1.178 |             |                                                                                          |
| Glyma.12G192100.1  | 1.179 | AT2G32540.1 | cellulose synthase-like B4                                                               |
| Glyma.15G187100.1  | 1.179 | AT2G01690.2 | ARM repeat superfamily protein                                                           |
| Glyma.17G027700.1  | 1.179 | AT3G06860.1 | multifunctional protein 2                                                                |
| Glyma.17G242300.1  | 1.179 | AT5G42890.1 | sterol carrier protein 2                                                                 |
| Glyma.04G217100.1  | 1.179 | AT1G76010.1 | Alba DNA/RNA-binding protein                                                             |
| Glyma.13G181100.2  | 1.179 | AT2G47960.1 |                                                                                          |
| Glyma.08G214500.2  | 1.179 | AT1G15740.1 | Leucine-rich repeat family protein                                                       |
| Glyma.18G187600.1  | 1.179 | AT2G37770.2 | NAD(P)-linked oxidoreductase superfamily protein                                         |
| Glyma.09G137300.1  | 1.180 | AT4G20850.1 | tripeptidyl peptidase ii                                                                 |
| Glyma.01G077300.3  | 1.180 | AT5G03900.2 | Iron-sulphur cluster biosynthesis family protein                                         |
| Glyma.04G182200.1  | 1.180 |             |                                                                                          |
| Glyma.10G140500.4  | 1.180 | AT3G62010.1 |                                                                                          |
| Glyma.09G177200.1  | 1.180 | AT3G22190.1 | IQ-domain 5                                                                              |
| Glyma.11G009300.2  | 1.180 | AT1G65020.1 |                                                                                          |
| Glyma.16G159700.1  | 1.180 | AT5G17680.1 | disease resistance protein (TIR-NBS-LRR class), putative                                 |
| Glyma.10G141000.1  | 1.180 | AT3G05940.1 | Protein of unknown function (DUF300)                                                     |
| Glyma.02G283000.5  | 1.181 | AT4G19645.1 | TRAM, LAG1 and CLN8 (TLC) lipid-sensing domain containing protein                        |
| Glyma.17G135200.5  | 1.181 | AT1G62850.2 | Class I peptide chain release factor                                                     |
| Glyma.06G316700.1  | 1.181 | AT2G21770.1 | cellulose synthase A9                                                                    |
| Glyma.11G241500.5  | 1.181 | AT5G65280.1 | GCR2-like 1                                                                              |
| Glyma.10G038700.1  | 1.181 | AT4G28550.1 | Ypt/Rab-GAP domain of gyp1p superfamily protein                                          |
| Glyma.02G086200.1  | 1.181 | AT1G68020.2 | UDP-Glycosyltransferase / trehalose-phosphatase family protein                           |
| Glyma.19G001800.1  | 1.181 |             |                                                                                          |
| Glyma.06G082400.2  | 1.181 | AT5G11520.1 | aspartate aminotransferase 3                                                             |
| Glyma.08G073700.1  | 1.181 | AT2G13840.1 | Polymerase/histidinol phosphatase-like                                                   |
| Glyma.06G258600.1  | 1.181 |             |                                                                                          |
| Glyma.15G257600.1  | 1.181 | AT1G06620.1 | 2-oxoglutarate (2OG) and Fe(II)-dependent oxygenase superfamily protein                  |
| Glyma.11G195800.2  | 1.181 | AT5G60760.1 | P-loop containing nucleoside triphosphate hydrolases superfamily protein                 |
| Glyma.05G229900.1  | 1.182 | AT4G29000.1 | Tesmin/TSO1-like CXC domain-containing protein                                           |
| Glyma.14G017300.1  | 1.182 | AT4G39952.1 | Pentatricopeptide repeat (PPR) superfamily protein                                       |
| Glyma.09G226600.2  | 1.182 | AT3G60910.1 | S-adenosyl-L-methionine-dependent methyltransferases superfamily protein                 |
| Glyma.08G242000.4  | 1.183 | AT5G39360.1 | EID1-like 2                                                                              |
| Glyma.10G089600.3  | 1.183 | AT5G47970.1 | Aldolase-type TIM barrel family protein                                                  |
| Glyma.12G209500.1  | 1.183 | AT2G42560.1 | late embryogenesis abundant domain-containing protein / LEA domain-containing protein    |
| Glyma.15G209900.1  | 1.183 | AT4G26965.1 | NADH:ubiquinone oxidoreductase, 17.2kDa subunit                                          |
| Glyma.02G203200.3  | 1.183 | AT5G58160.1 | actin binding                                                                            |
| Glyma.04G029500.8  | 1.183 | AT1G75400.1 | RING/U-box superfamily protein                                                           |
| Glyma.03G219000.1  | 1.184 | AT1G02610.1 | RING/FYVE/PHD zinc finger superfamily protein                                            |
| Glyma.06G103200.6  | 1.184 | AT4G08920.1 | cryptochrome 1                                                                           |
| Glyma.U022600.1    | 1.184 | AT1G62310.1 | transcription factor jumonji (jmc) domain-containing protein                             |
| Glyma.06G001300.3  | 1.184 | AT5G12230.1 |                                                                                          |

|                   |       |             |                                                                                          |
|-------------------|-------|-------------|------------------------------------------------------------------------------------------|
| Glyma.12G027500.1 | 1.184 | AT3G19740.1 | P-loop containing nucleoside triphosphate hydrolases superfamily protein                 |
| Glyma.19G127800.2 | 1.184 | AT5G05140.1 | Transcription elongation factor (TFIIS) family protein                                   |
| Glyma.17G048100.2 | 1.185 | AT1G19110.1 | inter-alpha-trypsin inhibitor heavy chain-related                                        |
| Glyma.06G145700.2 | 1.185 | AT5G64940.1 | ABC2 homolog 13                                                                          |
| Glyma.17G150300.1 | 1.185 | AT5G55810.1 | nicotinate/nicotinamide mononucleotide adenyltransferase                                 |
| Glyma.10G099900.1 | 1.185 | AT1G51340.2 | MATE efflux family protein                                                               |
| Glyma.03G017700.1 | 1.185 |             |                                                                                          |
| Glyma.09G105500.1 | 1.186 | AT3G58530.1 | RNI-like superfamily protein                                                             |
| Glyma.17G003600.2 | 1.186 | AT3G13340.1 | Transducin/WD40 repeat-like superfamily protein                                          |
| Glyma.17G006000.1 | 1.186 | AT4G16360.3 | 5'-AMP-activated protein kinase beta-2 subunit protein                                   |
| Glyma.02G112400.1 | 1.186 | AT1G13950.1 | eukaryotic elongation factor 5A-1                                                        |
| Glyma.12G111000.1 | 1.186 | AT2G20770.1 | GCR2-like 2                                                                              |
| Glyma.19G160600.1 | 1.186 | AT3G22970.1 | Protein of unknown function (DUF506)                                                     |
| Glyma.03G108200.4 | 1.186 | AT1G02145.3 | homolog of asparagine-linked glycosylation 12                                            |
| Glyma.13G319500.2 | 1.186 | AT5G22650.2 | histone deacetylase 2B                                                                   |
| Glyma.15G060100.1 | 1.186 | AT5G64420.1 | DNA polymerase V family                                                                  |
| Glyma.06G240500.1 | 1.187 | AT4G27500.1 | proton pump interactor 1                                                                 |
| Glyma.15G097100.2 | 1.187 | AT5G18640.1 | alpha/beta-Hydrolases superfamily protein                                                |
| Glyma.15G027900.1 | 1.187 | AT2G43500.1 | Plant regulator RWP-RK family protein                                                    |
| Glyma.09G052700.2 | 1.187 | AT2G35060.1 | K <sup>+</sup> uptake permease 11                                                        |
| Glyma.18G136900.2 | 1.187 | AT1G23860.1 | RS-containing zinc finger protein 21                                                     |
| Glyma.05G224700.3 | 1.187 | AT5G11700.1 |                                                                                          |
| Glyma.08G251300.1 | 1.188 | AT5G38895.3 | RING/U-box superfamily protein                                                           |
| Glyma.09G270100.1 | 1.188 | AT2G38670.1 | phosphorylethanolamine cytidyltransferase 1                                              |
| Glyma.09G145800.2 | 1.188 | AT4G00755.1 | F-box family protein                                                                     |
| Glyma.20G066800.1 | 1.188 | AT4G22120.1 | ERD (early-responsive to dehydration stress) family protein                              |
| Glyma.06G297800.1 | 1.188 | AT4G10265.1 | Wound-responsive family protein                                                          |
| Glyma.03G204400.1 | 1.188 | AT5G22000.2 | RING-H2 group F2A                                                                        |
| Glyma.04G185700.1 | 1.188 | AT5G63050.1 | embryo defective 2759                                                                    |
| Glyma.04G058600.1 | 1.189 | AT5G10730.1 | NAD(P)-binding Rossmann-fold superfamily protein                                         |
| Glyma.13G155900.1 | 1.189 | AT1G15860.1 | Domain of unknown function (DUF298)                                                      |
| Glyma.09G237300.2 | 1.189 | AT3G28970.1 | Domain of unknown function (DUF298)                                                      |
| Glyma.03G181500.1 | 1.189 | AT1G31335.1 |                                                                                          |
| Glyma.08G332700.2 | 1.189 | AT3G13225.2 | WW domain-containing protein                                                             |
| Glyma.08G089600.2 | 1.190 | AT1G30880.1 |                                                                                          |
| Glyma.10G229500.1 | 1.190 | AT5G52880.1 | F-box family protein                                                                     |
| Glyma.18G006100.2 | 1.190 | AT1G27385.3 |                                                                                          |
| Glyma.05G159400.3 | 1.190 | AT4G18710.1 | Protein kinase superfamily protein                                                       |
| Glyma.10G283900.2 | 1.191 | AT5G27280.1 | Zim17-type zinc finger protein                                                           |
| Glyma.17G199600.1 | 1.191 | AT2G45330.1 | RNA 2'-phosphotransferase, Tpt1 / KptA family                                            |
| Glyma.15G019400.1 | 1.191 | AT3G16350.1 | Homeodomain-like superfamily protein                                                     |
| Glyma.17G047600.5 | 1.191 | AT1G17370.1 | oligouridylate binding protein 1B                                                        |
| Glyma.03G238500.1 | 1.191 |             |                                                                                          |
| Glyma.08G224600.1 | 1.192 | AT2G46910.1 | Plastid-lipid associated protein PAP / fibrillin family protein                          |
| Glyma.04G191500.1 | 1.192 | AT5G63190.1 | MA3 domain-containing protein                                                            |
| Glyma.06G290400.1 | 1.192 | AT5G44280.1 | RING 1A                                                                                  |
| Glyma.10G297700.1 | 1.193 | AT2G31660.1 | ARM repeat superfamily protein                                                           |
| Glyma.03G118900.1 | 1.193 | AT5G04190.1 | phytochrome kinase substrate 4                                                           |
| Glyma.09G174500.1 | 1.193 | AT3G24180.1 | Beta-glucosidase, GBA2 type family protein                                               |
| Glyma.06G145800.3 | 1.193 | AT5G64930.1 | CPR5 protein, putative                                                                   |
| Glyma.09G137700.1 | 1.193 | AT5G55240.1 | ARABIDOPSIS THALIANA PEROXYGENASE 2                                                      |
| Glyma.08G102600.1 | 1.193 | AT1G67580.1 | Protein kinase superfamily protein                                                       |
| Glyma.15G230900.1 | 1.193 | AT3G14460.1 | LRR and NB-ARC domains-containing disease resistance protein                             |
| Glyma.05G107700.1 | 1.193 | AT5G65880.1 |                                                                                          |
| Glyma.13G263700.1 | 1.194 |             |                                                                                          |
| Glyma.10G102200.6 | 1.194 | AT3G56720.2 |                                                                                          |
| Glyma.13G055200.1 | 1.194 | AT5G15610.2 | Proteasome component (PCI) domain protein                                                |
| Glyma.08G045700.1 | 1.194 | AT2G01680.1 | Ankyrin repeat family protein                                                            |
| Glyma.13G063600.1 | 1.194 | AT1G26830.1 | cullin 3                                                                                 |
| Glyma.09G181300.1 | 1.194 | AT1G15030.1 | Protein of unknown function (DUF789)                                                     |
| Glyma.03G186500.3 | 1.194 | AT3G21540.1 | transducin family protein / WD-40 repeat family protein                                  |
| Glyma.06G039200.1 | 1.195 | AT3G09560.1 | Lipin family protein                                                                     |
| Glyma.04G175700.1 | 1.195 | AT5G44240.1 | aminophospholipid ATPase 2                                                               |
| Glyma.16G199300.2 | 1.195 | AT4G25440.1 | zinc finger WD40 repeat protein 1                                                        |
| Glyma.06G127700.1 | 1.195 | AT5G53450.1 | OBP3-responsive gene 1                                                                   |
| Glyma.05G040400.3 | 1.195 | AT4G24670.1 | tryptophan aminotransferase related 2                                                    |
| Glyma.18G005200.1 | 1.195 | AT1G27300.1 |                                                                                          |
| Glyma.08G200500.1 | 1.195 | AT2G25850.4 | poly(A) polymerase 2                                                                     |
| Glyma.06G044900.1 | 1.195 | AT1G27700.1 | Syntaxin/t-SNARE family protein                                                          |
| Glyma.14G031000.1 | 1.196 | AT2G30860.1 | glutathione S-transferase PHI 9                                                          |
| Glyma.03G132800.1 | 1.196 | AT5G03990.1 |                                                                                          |
| Glyma.12G173200.1 | 1.196 | AT5G60600.1 | 4-hydroxy-3-methylbut-2-enyl diphosphate synthase                                        |
| Glyma.09G052000.1 | 1.196 | AT5G44790.1 | copper-exporting ATPase / responsive-to-antagonist 1 / copper-transporting ATPase (RAN1) |
| Glyma.17G023700.1 | 1.196 |             |                                                                                          |
| Glyma.19G001300.2 | 1.196 | AT4G11120.1 | translation elongation factor Ts (EF-Ts), putative                                       |
| Glyma.05G228700.1 | 1.197 | AT4G28880.1 | casein kinase I-like 3                                                                   |
| Glyma.12G163500.5 | 1.197 | AT4G30580.1 | Phospholipid/glycerol acyltransferase family protein                                     |
| Glyma.17G000900.1 | 1.197 | AT1G09794.1 | Cox19 family protein (CHCH motif)                                                        |
