# Supplementary material
Source: publisher figshare collection journal article supplement (https://tandf.figshare.com/articles/dataset/_/11276222)
Supplement: Supplementary file 1 [file 1 › tbbb_a_1696179_sm7629.pdf]

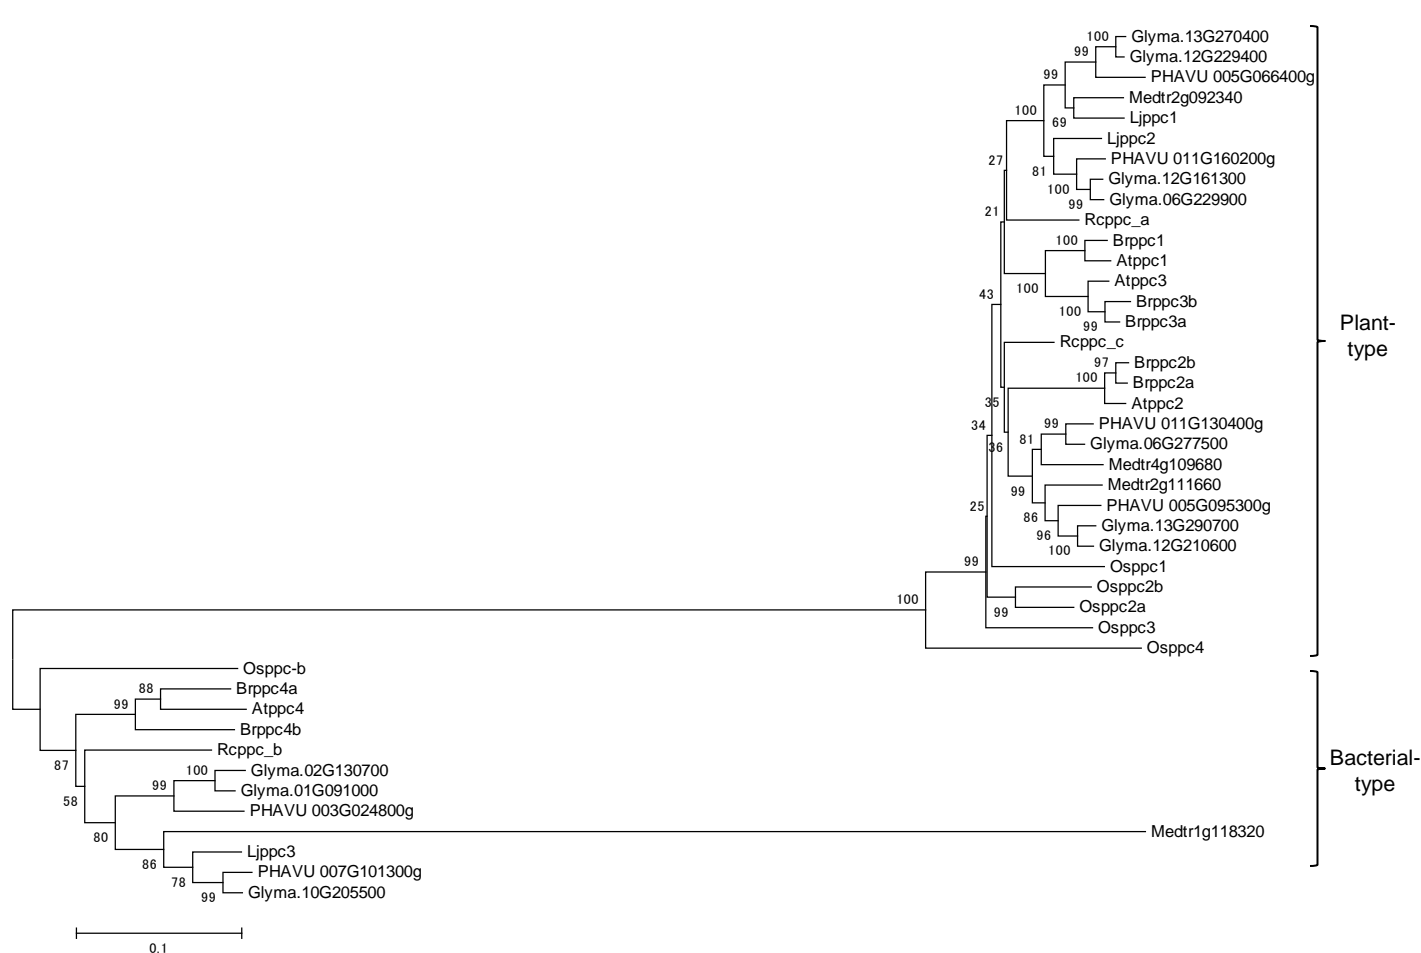

**Supplementary Material 6** The phylogenetic tree of PEPC in soybean and six other plant species. PHAVU003G024800g, PHAVU005G066400g, PHAVU005G095300g, PHAVU007G101300g, PHAVU011G130400g, and PHAVU011G160200g are from *P. vulgaris*. Medtr1g118320, Medtr2g092340, Medtr4g109680, and Medtr2g111660 are from *M. truncatula*. Ljppc1, Ljppc2, and Ljppc3 are from *L. japonicus*. Rcppc\_a, Rcppc\_b, and Rcppc\_c are from *Ricinus Communis*. Brppc1, Brppc2a, Brppc2b, Brppc3a, Brppc3b, Brppc4a, and Brppc4b are from *Brassica rapa*. Atppc1, Atppc2, Atppc3, and Atppc4 are from Arabidopsis. Osppc1, Osppc2a, Osppc2b, Osppc3, Osppc4, and Osppc-b are from rice.
