# Supplementary material
Source: publisher figshare collection journal article supplement (https://tandf.figshare.com/articles/dataset/_/11276222)

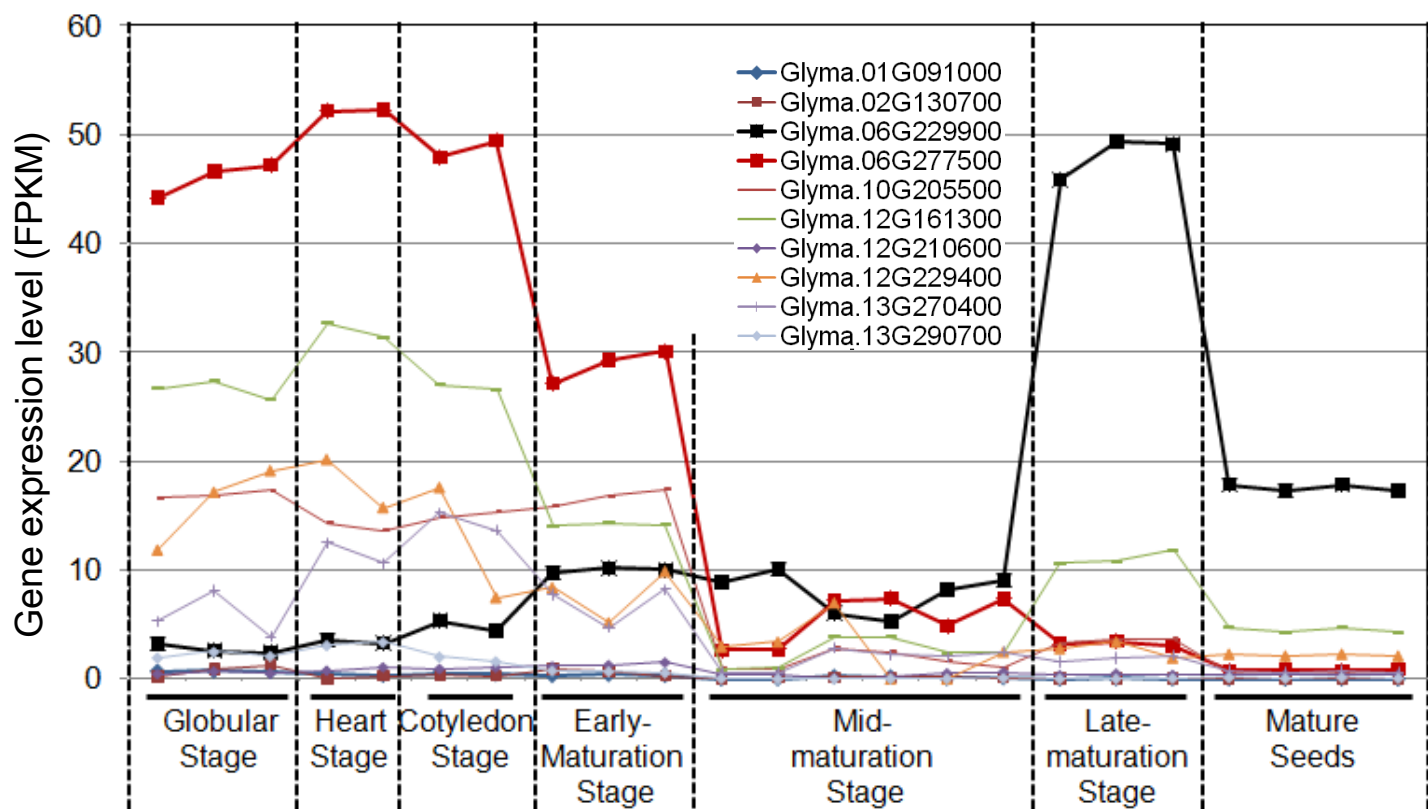

**Supplementary Material 3.** Gene expression levels of PEPC isogenes in soybean whole seeds.

Supplement: Supplementary file 1 [file 1 › tbbb_a_1696179_sm7626.pdf]
